1 Resistance to change? The impact of group medication on AMR gene dynamics during commercial  
2 pig production

3

4 Jolinda Pollock<sup>a,b</sup>, Adrian Muwonge<sup>b</sup>, Michael R. Hutchings<sup>a</sup>, Geoffrey Mainda<sup>b</sup>, Barend M.  
5 Bronsvoort<sup>b</sup>, Laura C. Duggan<sup>c</sup>, David L. Gally<sup>b</sup> and Alexander Corbishley<sup>b#</sup>

6

7 <sup>a</sup>Animal and Veterinary Sciences, Scotland's Rural College (SRUC), Edinburgh, United Kingdom

8 <sup>b</sup>The Roslin Institute and Royal (Dick) School of Veterinary Studies, University of Edinburgh,  
9 Edinburgh, United Kingdom

10 <sup>c</sup>Taylor Wildlife, The Haugh, Ballindalloch, United Kingdom

11

12 Running Head: AMR gene dynamics in medicated pigs

13

14 #Corresponding Author: Alexander Corbishley – [alexander.corbishley@roslin.ed.ac.uk](mailto:alexander.corbishley@roslin.ed.ac.uk)

15

16

17

18

## 19 **Abstract**

20 The anthropogenic selection of antimicrobial resistance (AMR) genes is under intense scrutiny,  
21 particularly in livestock production, where group antimicrobial administration is used to control  
22 disease. Whilst large epidemiological studies provide important data on the diversity and  
23 distribution of AMR genes, we have little insight into how group antimicrobial administration  
24 impacts AMR gene abundance and diversity within a system. Here, faecal microbiome and AMR  
25 gene dynamics were tracked for six months through a standard production cycle on a commercial  
26 pig unit. Our results demonstrate that specific AMR genes have reached an equilibrium across this  
27 farming system to the extent that the levels measured were maintained from suckling through to  
28 slaughter, despite increases in microbiome diversity in early development. These levels were not  
29 influenced by antibiotic use, either during the production cycle or following whole herd  
30 medication. Some AMR genes were found at levels higher than that of the bacterial 16S rRNA  
31 gene, indicating widespread distribution across the most common bacterial genera. The targeted  
32 AMR genes were also detected in nearby soil samples, several with decreasing abundance with  
33 increasing distance from the unit, demonstrating that the farm acts as a point source of AMR gene  
34 ‘pollution’. Metagenomic sequencing of a subset of samples identified 144 AMR genes, with  
35 higher gene diversity in the piglet samples compared to the sow samples. Critically, despite  
36 overwhelming and stable levels of resistance alleles against the main antimicrobials used on this  
37 farm, these compounds continue to control the bacterial pathogens responsible for production  
38 losses and compromised welfare.

39

## 40 **Importance**

41 Group antibiotic treatment has been used for decades to control bacterial diseases that reduce the  
42 productivity and compromise the welfare of livestock. Recent increases in antibiotic resistant  
43 infections in humans has resulted in concerns that antibiotic use in livestock may contribute to the  
44 development of untreatable bacterial infections in humans. There is however little understanding  
45 as to how the genes that bacteria require to become resistant to antibiotics respond during and after  
46 group antibiotic treatment of livestock, particularly in systems where high levels of antibiotics  
47 have been used for a prolonged period of time. We show that in such a system, levels of specific  
48 antibiotic resistance genes are high irrespective of group antibiotic treatments, whilst dramatic  
49 reductions in antibiotic use also fail to reduce the levels of these genes. These findings have  
50 important implications for public policy relating to the use of antibiotic in livestock farming.

51

## 52 **Introduction**

53 Antimicrobials, including antibiotics and micronutrients such as copper and zinc (1), are used  
54 regularly in many agricultural systems worldwide to improve the health, welfare and productivity  
55 of livestock (2, 3). This has led to concerns about the anthropogenic selection of antimicrobial-  
56 resistant bacteria in livestock systems (3–5), particularly due to the potential transfer of  
57 antimicrobial resistance (AMR) genes from livestock to humans (6–8) and into the environment  
58 (9, 10).

59 In 2016, coordinated international action by the World Health Assembly, G7, G20 and the United  
60 Nations was called for following a wide-ranging review commissioned by the UK government,  
61 which included proposed global targets, based on livestock biomass, to reduce antibiotic use in  
62 livestock by 2025 (11). The European Commission currently benchmarks antibiotic usage between  
63 member states using a population correction unit (PCU), a standardised measure of livestock  
64 biomass (12). Whilst an imperfect measure, it is clear that the variability in antibiotic usage  
65 between countries (12, 13), agricultural sectors (14) and individual farms (15–17) is vast.  
66 Livestock antibiotic sales ranged from 2.9 to 453.4 mg/PCU across 30 European countries in 2016,  
67 with usage in the United Kingdom (UK) calculated as 45 mg/PCU (12). In Europe, tetracyclines,  
68 penicillins and sulphonamides accounted for 70% of livestock antibiotic sales (12), whilst in the  
69 UK, 52% of all antimicrobials sold for livestock were used in the pig and poultry sectors, with  
70 tetracyclines being reported as the highest sold antimicrobial class (14).

71 Given the substantial use of antimicrobials in pig and poultry production, the association between  
72 antimicrobial use and AMR has been an area of intensive study. Multiple studies have associated  
73 the use of antibiotics (13, 18–20) and zinc or copper supplementation (1, 21–24) in pig production

74 with increases in phenotypic resistance in indicator organisms or pathogenic bacteria.  
75 Metagenomic data has revealed associations between antibiotic usage in pigs and poultry with  
76 increases in AMR gene prevalence, with lower AMR gene diversity, but higher AMR gene loads  
77 being observed on pig units in comparison to poultry units (25). Administration of oxytetracycline  
78 immediately post-weaning has also been shown to increase the abundance of AMR genes  
79 conferring tetracycline, beta-lactam and multi-drug resistance (26). The persistence of AMR genes  
80 on pig units has also been assessed, with differences in specific AMR gene levels being observed  
81 when comparing samples from sows and finishers (27).

82 There are currently few longitudinal studies of AMR in livestock systems, specifically for pig  
83 production (28). Those that exist for pig production are again predominantly focussed on specific  
84 indicator organisms (18, 20, 29–34), meaning that the resistance potential within the total  
85 microbiota is likely being underestimated (16, 32, 35). In addition, information on antimicrobial  
86 use is often derived from national figures (13, 25), rather than from individual units. There are  
87 currently no longitudinal studies describing the relationship between antimicrobial usage,  
88 microbiome diversity and AMR gene dynamics in pigs in a commercial setting. Such knowledge  
89 is key to defining the risk that antimicrobial use in pigs poses to contamination of the environment  
90 with AMR genes and in developing effective policies to minimise the proliferation and  
91 dissemination of AMR genes.

92 Here, a longitudinal study was carried out on a UK commercial pig unit with high antimicrobial  
93 usage to track variation in the faecal microbiome and AMR gene abundance and diversity. Piglets  
94 were sampled weekly from birth to slaughter over a six-month period that included the  
95 administration of acidified water, and three prolonged periods of in-feed antimicrobial

96 administration (zinc, chlortetracycline and tylosin). Dry sows that were not administered in-feed  
97 antimicrobials were sampled in parallel, whilst soil sampling was carried out around the farm  
98 perimeter at a single time point to assess the abundance of potential AMR gene ‘pollutants’ in the  
99 environment. In addition, a final set of samples were taken from sows prior to, during and after a  
100 partial depopulation event (i.e. a management practice which lowers disease burden within a herd)  
101 which involved antibiotic administration to every pig on the farm to assess if this practice impacted  
102 on AMR gene abundance. To address our aims, 16S rRNA gene metabarcoding, quantitative PCR  
103 (qPCR) and whole genome shotgun metagenomics were used to measure microbiome diversity,  
104 AMR gene abundances and AMR gene diversity, respectively.

105

## 106 **Materials and methods**

### 107 **Farm description**

108 This study received ethical approval from the Royal (Dick) School of Veterinary Studies  
109 Veterinary Ethics Research Committee. A 600 sow Landrace x Large White commercial farrowing  
110 to finishing unit in the UK, with detailed antimicrobial usage records, was recruited. Batch  
111 farrowing occurred every four weeks, with the study starting one week prior to the October 2016  
112 batch farrowing. Nursing sows and piglets were housed on slats, whilst dry sows were housed in  
113 straw yards. Additional herd information is available in **Supplementary Materials 1**.

### 114 **Sampling**

115 To capture gut microbiota and AMR gene dynamics on this farm, we collected weekly faecal  
116 samples (no sampling on week 6 (W6) due to access issues) starting on 26<sup>th</sup> October 2016 and  
117 ending on 5<sup>th</sup> April 2017 when the studied batch of pigs were sent for slaughter. The study design,  
118 sampling points and antimicrobial agents used are visualised in **Fig 1**. On W1, faecal drop samples  
119 were collected from the floor of six farrowing crates containing pregnant sows (n = 6). Between  
120 W2 and W4, both sow and piglet faecal drop samples were obtained from the same farrowing  
121 crates as W1. On W5, all piglets were weaned and mixed into three groups prior to movement into  
122 the weaning house. From W5 to W13, pooled faecal drop samples were taken from each of these  
123 three pens to capture pen-level dynamics. On W14, these pigs were moved into the grower/finisher  
124 house and remained in the same pen formation as in the weaner house. Thereafter, from W14 to  
125 W25, pooled faecal drop samples were taken weekly from each of these pens until slaughter.  
126 Weekly faecal samples were also taken randomly from the sow barn (n = 6) and slurry tanks (n =  
127 2) to establish background levels of resistance in a group of adult pigs not given in-feed

128 antimicrobials and across the farm as a whole, respectively. To examine the impact on the  
129 immediate surroundings of this farm, we also took samples from the environment around the pig  
130 unit. Thirty sampling locations were randomly chosen from within the farm boundary using the  
131 geographic information system application QGIS (QGIS Development Team, Version 2.18.13).  
132 Samples were taken from the surface at each point, and the substrate type was recorded (i.e. soil  
133 or faeces). If a sampling point was unsuitable due to features on the ground (i.e. standing water,  
134 access issues or trees), the point was moved the minimum distance necessary to clear the feature  
135 in a random direction and the new co-ordinates were recorded. As the study farm was located in a  
136 region of high pig farm density, comparator soil samples were obtained from areas close to the  
137 investigators' laboratory that had no history of exposure to agricultural slurry (i.e. public parks and  
138 forestry areas).

139 In an effort to improve health status and reduce antimicrobial use, the farm underwent a partial  
140 depopulation in May 2017. This involved removing all the young pigs (i.e. sucking piglets,  
141 weaners, growers and finishers) from the farm and fumigating the young pig accommodation with  
142 formaldehyde. Faecal samples were obtained from the sow barn during (W36) and after (W45 and  
143 W57) (n = 6) antimicrobial treatment of the sows used as part of the partial depopulation.

144 All samples described were collected in spooned universal tubes and stored at -20°C on site and  
145 samples were batch transported back to the laboratory on dry ice before being stored at -80°C prior  
146 to processing.

#### 147 **DNA extractions and dry matter calculations**

148 All DNA extractions were carried out using the DNeasy PowerSoil Kit (Qiagen, UK). Briefly, 250  
149 mg of faeces or soil were thoroughly homogenised and then weighed prior to being transferred



150 into the included bead tube with 60  $\mu$ l of Solution 1. The samples were then mixed using a vortex  
151 prior to being homogenised for 45 seconds at 5.0 m s<sup>-1</sup> using a FastPrep FP120 Cell Disrupter  
152 (Qbiogene Inc, France). The homogenised samples were then processed according to the  
153 manufacturer's instructions.

154 In parallel, approximately 1 g of homogenised faeces or soil were weighed out, transferred to a  
155 foil weighing boat and placed into a drying oven set at 60°C overnight. In order to calculate the  
156 percentage of dry matter (% DM), the foil weighing boats were weighed prior to and after the  
157 material was added and were re-weighed after overnight drying.

## 158 **Quantitative PCR**

159 Five AMR genes were selected to quantify using qPCR. The selection of these genes was based  
160 on the results of an initial end-point PCR screening of a sub-sample of DNA extracts obtained  
161 from the final sampling point (faecal samples = 6, soil samples = 3). A panel of 30 genes were  
162 selected, on the basis that these genes were of biological relevance to the historic use of  
163 antimicrobials on the pig unit and of importance to both veterinary and human medicine (see  
164 **Supplementary Materials 2** for list of target genes and primer sequences). Genes which were  
165 amplified from more than 50% of the faecal samples were shortlisted for qPCR analysis. The  
166 selection for qPCR contained genes associated with tetracycline (*tetB* and *tetQ*), tylosin (*ermA* and  
167 *ermB*) and trimethoprim resistance (*dfrA1*) which are linked to the antimicrobials historically and  
168 currently administered in-feed on the farm. Quantification of the 16S rRNA gene was included as  
169 a proxy of overall bacterial load. Plasmids containing gene fragments of *tetB*, *tetQ*, *ermA*, *ermB*,  
170 *dfrA1* and the 16S rRNA gene were generated in-house for absolute quantification of gene copy  
171 number.

172 qPCR mixtures were set up using Brilliant III Ultra-Fast qPCR Mastermix (Agilent Technologies,  
173 United States), reference dye (Agilent Technologies, United States) and the primers and probes  
174 (as designed previously (35–50) or in the current study) listed in **Supplementary Material 2**. Each  
175 reaction was carried out in triplicate in a final volume of 20  $\mu\text{l}$ , containing 1  $\mu\text{l}$  of extracted DNA.  
176 Twenty-four samples were run per 96-well plate, which also included DNA standards (at  
177 concentrations ranging from  $10^7$  to  $10^1$  gene copies per  $\mu\text{l}$ ) and a no-template control (nuclease-  
178 free water). Absolute quantification was carried out using a Stratagene MX3005P qPCR System  
179 (Agilent Technologies, UK) using the following fast, two-step cycling conditions: 95°C (5  
180 minutes), followed by 40 cycles of amplification at 95°C (15 seconds) then 60°C (30 seconds).

181 Standard curves were constructed from the threshold cycle ( $C_T$ ) values using the Stratagene MxPro  
182 Software (Agilent Technologies, UK) and within this software, the calculated gene copy number  
183 per  $\mu\text{l}$  for each of the samples was generated, treating each of the three replicates individually. Any  
184 samples which fell beneath the limit of detection (i.e.  $10^1$  copies per  $\mu\text{l}$  DNA, equivalent to 3.3 –  
185 4.9  $\log_{10}$  copies/g DM) were re-run to confirm the findings. These values were then exported in  
186 Microsoft Excel spreadsheet format and the arithmetic means for the technical replicates  
187 calculated. These values were then converted into gene copy number per gram of dry matter (using  
188 the % DM values calculated) and  $\log_{10}$ -transformed for data visualisation and statistical analysis.

### 189 **16S rRNA gene metabarcoding**

190 All samples collected from the sow barn and piglet accommodation were prepared for 16S rRNA  
191 gene metabarcoding targeting the V3 hypervariable region, as described in previous work (51).  
192 Six library pools were compiled using equimolar concentrations of DNA from each sample. A  
193 mock bacterial community (20 Strain Even Mix Genomic Material ATCC®MSA-1002, ATCC,

194 United States) and a reagent-only control (generated by passage of nuclease-free water throughout  
195 the library preparation process) were included in each pool to assess background contamination  
196 and sequencing error rate. Using the mock bacterial community sequences, the mean sequencing  
197 error rate was calculated as 0.01%.

198 The pools were submitted to the sequencing centre (Edinburgh Genomics, United Kingdom) where  
199 the pools were quantified using the Quant-iT™ PicoGreen® double-stranded DNA Assay Kit  
200 (Thermo Fisher Scientific, UK) to ensure sufficient yield for sequencing. Sequencing was carried  
201 out using the Illumina MiSeq platform (Illumina, United States), using V2 chemistry and  
202 producing 250 bp paired-end reads. The sequence files generated, with the primers removed, will  
203 be made publicly available through the NCBI Sequence Read Archive (SRA).

204 The generated sequences were processed using cutadapt (Martin, 2011) and mothur (Schloss et al,  
205 2009) (URL: [https://www.mothur.org/wiki/MiSeq\\_SOP](https://www.mothur.org/wiki/MiSeq_SOP). Accessed January 2018) as described  
206 previously (51). Here, unique sequences were binned using a database-independent approach. A  
207 mean of 125,312 sequences per sample were retained post quality control and were subsampled to  
208 10,000 sequences per sample for analysis. The Inverse Simpson index (ISI) and Shannon index  
209 (SI) were calculated for each sample to assess alpha diversity.

## 210 **Statistical analysis**

211 Repeated measures analysis of variance was carried out (Genstat 16, VSN International, UK) to  
212 assess temporal changes in gene copy number or alpha diversity indices in both the sow barn and  
213 piglet accommodation samples, with least significant differences being used for multiple  
214 comparisons of means to assess the impact of antimicrobial treatments on these parameters in the  
215 piglet accommodation. For the sow barn analyses, the values calculated from samples collected

216 between W1-W25 were included in the statistical models. For the piglet accommodation analyses,  
217 the values calculated from samples collected between W5-W25 were included in the statistical  
218 models, since W1 samples were obtained from pregnant sows only and samples obtained between  
219 W2-W4 were obtained when the piglets were still grouped by litter and were not yet assigned to  
220 their rearing pens. For the piglet accommodation analyses, the pen was included as a factor to  
221 assess any differences between the triplicate pen samples.

## 222 **Shotgun metagenomic sequencing**

223 Three time points were selected that corresponded to antimicrobial treatment in the piglets (**Fig 1**).  
224 Triplicate samples from both the sow barn (i.e. no in feed antimicrobial use) and piglet  
225 accommodation were submitted for shotgun metagenomic sequencing (Edinburgh Genomics,  
226 United Kingdom). Illumina TruSeq DNA Nano libraries were prepared using the submitted faecal  
227 DNA extracts and sequencing was carried out using the HiSeq 4000 platform generating 150 bp  
228 paired-end reads (Illumina, United States).

229 Host DNA was removed from the raw reads by mapping to the *Sus Scrofa* reference genome  
230 GCA\_000003025 version 11.1 (52) and Phix DNA (PhiX 174) (53) was removed using the  
231 run\_contaminant\_filter.pl script which is part of the Microbiome Helper suite (54). Read quality  
232 control was carried out using trimmomatic (55). These paired end reads were then mapped to  
233 MEGARes (56), a hand-curated AMR gene database, using the paired-end option of BWA (57).  
234 The resistome profiling was carried out using the ResistomeAnalyzer function in MEGARes with  
235 the gene fraction threshold set at 90. In order to obtain a read per kilobase (RPK) normalised  
236 abundance count, the Humann2 script which is part of the Humann2 pipeline (58) was used to  
237 analyse the SAM file produced from the mapping step above. The resultant gene family output

238 was then normalised using the humann2\_renom\_table script. The generated tsv and csv files were  
239 then used to analyse AMR gene abundances in R version 3.5 (59). The downstream analysis of  
240 AMR gene diversity and data visualisation were carried out using the ggplot2 (60) package in R.

241

## 242 **Results**

### 243 **Defining antibiotic usage**

244 In the three months prior to the study period, a total of 389.1 mg/PCU of antibiotics were used on  
245 the study farm. This compares to a UK average in pigs of 183 mg/PCU in 2016 (61), making this  
246 a high antibiotic usage farm. During the study period, the following routine group medication  
247 regimens were used (**Fig 1**): toltrazuril (30 mg/head oral) at 4 days old to control *Isospora suis*,  
248 zinc (2500 ppm in feed) between 4 and 6 weeks old to control post-weaning colibacillosis, acidified  
249 water (Baynes Evacide S 0.2%) to control post-weaning colibacillosis between 3 and 7 weeks old,  
250 chlortetracycline (300 ppm in feed) from 6 to 8 1/2 weeks old to control *Mycoplasma*  
251 *hyopneumoniae* and *Mycoplasma hyorhinis* and tylosin (100 ppm in feed) from 8 1/2 weeks old  
252 until slaughter to control *Mycoplasma hyopneumoniae*, *Mycoplasma hyorhinis*, *Actinobacillus*  
253 *pleuropneumoniae* and *Lawsonia intracellularis*.

254 During the partial depopulation, the dry sows received 1500 ppm chlortetracycline and 500 ppm  
255 tiamulin in-feed, whilst the nursing sows received 1875 ppm chlortetracycline and 625 ppm  
256 tiamulin. In the three months that included this partial depopulation, total antimicrobial use  
257 increased to 582.8 mg/PCU, which then declined to 32.3 mg/PCU in the three months after the  
258 partial depopulation.

### 259 **AMR gene abundances and microbiome diversity**

260 All five genes studied reached levels exceeding 7 log<sub>10</sub> copies/g of dry matter (DM) faeces in both  
261 the piglet accommodation and sow barn during the study (**Fig 2**). Prior to weaning, the levels of  
262 all five genes were similar when comparing the nursing sow and piglet samples (**Fig 2a**), even  
263 though the alpha diversity of the faecal microbiome was markedly lower in samples obtained from

264 the piglets (**Fig 3**). As the alpha diversity increased in the piglet samples over the first few weeks  
265 of life, the AMR gene counts remained relatively stable, despite marked restructuring of the faecal  
266 microbiota.

267 When comparing AMR gene abundances in the piglet accommodation samples (**Fig 2a**) after  
268 weaning (W5-W25) to the sow barn samples (**Fig 2c**), *tetQ* was the most abundant gene in both  
269 locations, whilst *ermA* and *tetB* were the least abundant in the piglet accommodation and sow barn,  
270 respectively. At times, the levels of *tetB*, *ermA* and *dfrA1* dropped below the limit of detection (3.3  
271 – 4.9 log<sub>10</sub> copies/g DM, depending on the DM of the sample) for particular samples. The 16S  
272 rRNA gene was detectable at levels exceeding 6 log<sub>10</sub> copies/g DM faeces in all samples and was  
273 similar when comparing the piglet accommodation (mean 9.18 log<sub>10</sub> copies/g DM, standard  
274 deviation (SD) 0.89) and sow barn samples (mean 9.41 log<sub>10</sub> copies/g DM, SD 0.84), indicating  
275 that bacterial DNA was detectable in all samples processed and bacterial load was similar in piglet  
276 and sow faeces.

277 Despite the sows receiving no group antimicrobial treatments during W1-W25, levels of *tetB*,  
278 *ermA* and *dfrA1* were numerically higher in the sow barn (means 6.39, 6.93 and 6.98 log<sub>10</sub> copies/g  
279 DM respectively, SD 1.50, 0.74, 1.44) compared to the post-weaning piglet accommodation  
280 (means 5.81, 4.24, 5.96 log<sub>10</sub> copies/g DM respectively, SD 1.61, 2.33, 1.38). Conversely, levels  
281 of *tetQ* and *ermB* were numerically higher in the post-weaning piglet accommodation (means 9.18,  
282 9.02 log<sub>10</sub> copies/g DM respectively, SD 0.73, 1.01) compared to the sow barn (means 8.91, 8.62  
283 log<sub>10</sub> copies/g DM respectively, SD 0.80, 0.96).

284 All the AMR genes were subject to temporal fluctuations in both the piglet accommodation and  
285 sow barn samples, with significant changes in 16S rRNA gene copy number also occurring in both

286 locations (**Table 1**). There were no significant differences in AMR and 16S rRNA gene levels ( $P$   
287  $> 0.05$ ), Shannon indices (SIs) ( $P = 0.86$ ,  $F = 0.15$ ) or Inverse Simpson indices (ISIs) ( $P = 0.50$ ,  
288  $F = 0.72$ ) when comparing triplicate pen samples from the piglet accommodation between W5 and  
289 W25.

290 The greatest change in AMR gene prevalence occurred during W22-24 (see **Supplementary**  
291 **Materials 3** for statistical output), during which time the abundance of all five genes studied  
292 increased in both the piglet accommodation and sow barn (**Fig 2a and 2b**). This coincided with an  
293 increase in the bacterial 16S rRNA gene abundance, suggesting an increase in overall bacterial  
294 load across both locations and was independent of antimicrobial administration, given that the  
295 sows were not receiving any treatment and the piglets had been on tylosin continuously for 12  
296 weeks prior to this point.

297 Other notable changes in AMR gene copy number include an increase in *dfrA1* counts in the piglet  
298 accommodation during acidified water and zinc administration between W5 (mean 4.17 log<sub>10</sub>  
299 copies/g DM, standard error of the mean (SEM) 0.80) and W7 (mean 5.58 log<sub>10</sub> copies/g DM,  
300 SEM 0.65) and a decrease in *ermA* between W5 (mean 6.83 log<sub>10</sub> copies/g DM, SEM 1.44) and  
301 W7 (2.70 log<sub>10</sub> copies/g DM, SEM 1.17). There were no marked shifts in the levels of *tetB*, *ermB*  
302 and *tetQ* between W5 and W7. A decrease in *tetB* gene copy number occurred in the piglet  
303 accommodation between W9 (mean 6.95 log<sub>10</sub> copies/g DM, SEM 0.79) and W10 (mean 3.29 log<sub>10</sub>  
304 copies/g DM, SEM 0.79) with no significant changes in *tetQ*, *ermA*, *ermB* or *dfrA1* levels being  
305 observed, despite the piglets having already been on chlortetracycline treatment for three weeks  
306 by W10.



307 Tylosin administration (W11-W25) did not have an effect on AMR and 16S rRNA gene counts in  
308 the piglet accommodation following withdrawal from chlortetracycline, but when the pigs were  
309 moved from the weaner/grower house (W13) into the finisher house (W14), increases in both *dfrAI*  
310 (3.37 to 6.99 log<sub>10</sub> copies/g DM, SEM 0.65), *ermA* (3.03 to 6.69 log<sub>10</sub> copies/g DM, SEM 1.17)  
311 and *tetB* (3.84 to 6.50 log<sub>10</sub> copies/g DM, SEM 0.79) occurred, with *ermB* and *tetQ* counts not  
312 changing markedly over this period.

313 In the sow barn samples, similar to the AMR genes, both SIs and ISIs varied significantly over  
314 time, with the piglet accommodation samples between W5-W25 remaining more stable and did  
315 not vary significantly during this phase (**Table 1**). There were, however, notable stepwise increases  
316 in both SIs (from 2.12 (W1) to 4.59 (W4), SD 0, 0.53) and ISIs (from 5.43 (W1) to 38.47 (W4),  
317 SD 0, 21.46) in the piglet accommodation samples during the first 4 weeks of life. In both  
318 locations, both the SIs and ISIs appeared unstable and oscillated between W8 and W25, which  
319 emphasises changes in the number of unique sequences and large variations in the number of  
320 sequences assigned to each taxonomic group, respectively.

### 321 **AMR gene diversity**

322 Triplicate samples from three time points were submitted from the sow barn and piglet  
323 accommodation for metagenomic sequencing. Across the 18 samples, a total of 144 AMR genes  
324 were identified (**Fig 4a**), 21 of which were ubiquitous across sampling location and time. The  
325 majority of the 60 genes that were present in both the piglet accommodation and sow barn were  
326 more abundant in the piglet accommodation. That said, abundance was generally within the same  
327 order of magnitude between the two sampling locations, whilst there were also notable examples  
328 where abundance was higher in the sow barn compared to the piglet accommodation. In agreement

329 with the qPCR results, two of these genes were *dfrA1* and *ermA*. Also in agreement with the qPCR  
330 results, *tetQ* and *ermB* were more abundant in the piglet accommodation than the sow barn. In  
331 contrast to the qPCR results, *tetB* was more abundant in the piglet accommodation. There was  
332 noticeably more diversity in AMR genes within the piglet accommodation compared to the sow  
333 barn, with 77 genes found solely in the piglet accommodation, compared to just 7 genes that were  
334 unique to the sow barn.

335 When examining the proportion of reads associated with each antimicrobial class, AMR genes  
336 associated with tetracycline, macrolide (MLS) and aminoglycoside resistance predominated across  
337 all samples (**Fig 4b**). With a few exceptions, these proportional results were consistent across the  
338 triplicate biological replicates. These proportional results were also broadly similar for the sows  
339 and piglets on and between W7 and W25, despite the piglets having been on tylosin treatment for  
340 a number of months at the W25 sampling.

341 The biggest change in the proportion of reads associated with each antimicrobial class occurred on  
342 W9 in both the piglet accommodation and sow barn. In the piglet accommodation, there was a  
343 proportional increase in reads associated with cross-class resistance (CCR). In the sow barn, the  
344 increase was seen in reads associated with aminoglycoside and sulphonamide resistance. These  
345 proportional changes were accompanied by an increase in AMR gene diversity from 94 genes in  
346 the piglet accommodation on W7 to 120 genes on W9 and 32 genes in the sow barn on W7 to 60  
347 genes on W9. The proportion of reads associated with tetracycline resistance declined between W7  
348 and W9, despite the piglets starting chlortetracycline treatment during this time. No change in  
349 management, feed or use of medications were reported in the sow barn between W7 and W9 to  
350 explain this shift in the relative abundance and diversity of resistance genes. These results suggest

351 changes in AMR gene abundance and diversity in response to an as yet unknown factor that  
352 affected the whole farm, rather than a specific response to antimicrobial administration.

353 In the piglet accommodation, there were both high levels and numbers (i.e. > 30) of genes  
354 conferring cross-class resistance (CCR) when the piglets were being administered zinc and  
355 acidified water (W7) and chlortetracycline (W9), but this number dropped by the end of the  
356 production cycle, despite the piglets having spent several months on in feed antimicrobials (**Fig**  
357 **4c**). Genes associated with CCR were not detected in the sow barn on W7 and W9, with only a  
358 single gene detected on W25. Nearly half i.e. 35 of the 77 genes found solely in the piglet  
359 accommodation were associated with CCR and appeared to be related to management  
360 interventions, potentially acidified water and zinc administration, other than in-feed antibiotic  
361 administration.

#### 362 **AMR gene quantification during and after a partial depopulation**

363 To improve the health status of the farm, all the young pigs were removed (partial depopulation)  
364 and the sows treated with in-feed chlortetracycline and tiamulin. During this time period, all the  
365 pigs on the farm were treated with antimicrobials simultaneously. Samples were taken from the  
366 sow barn during the last week of treatment (W36) and two (W45) and five (W57) months after  
367 cessation of treatment. Bacterial load and AMR gene copy number in the sow barn samples did  
368 not change either during or after in-feed antimicrobial administration (**Fig 2b**).

#### 369 **AMR gene quantification in environmental samples**

370 In the environmental samples (**Fig 2c**), the 16S rRNA gene copy number was lower when  
371 compared to the slurry samples, however it was stable across all the soil samples, regardless of  
372 their distance from the farm or location. In the comparator soils, there were no detectable levels of

373 *tetB*, *tetQ* or *dfrA1* and low levels of *ermA* and *ermB* genes. The abundance of all five AMR genes  
374 was lower in the environmental samples, compared to the slurry samples, whilst *tetB*, *ermB* and  
375 *dfrA1* showed a clear dilution effect, with AMR gene copy number declining with increasing  
376 distance from the sow barn.

377

## 378 **Discussion**

379 When designing this study, our first hypothesis was that there would be a reservoir of AMR genes  
380 within the faecal microbiome, which would increase in both abundance and potentially diversity  
381 in response to in-feed antimicrobial administration. Furthermore, we anticipated that AMR gene  
382 abundance would be inversely related to faecal microbiome diversity. Whilst large cross-sectional  
383 studies have been instrumental in furthering our understanding of AMR gene abundance and  
384 diversity across different livestock systems (13, 25, 62), they have not provided the granularity of  
385 data and medicines usage history required to test these hypotheses. For this reason, we chose to  
386 undertake a prolonged period of intensive sampling on a single large commercial pig unit during  
387 three ‘real world’ group in-feed antimicrobial treatment regimens.

### 388 **Measured AMR genes are at saturation in both medicated and non-medicated pigs**

389 Although previous work has demonstrated baseline high levels of specific AMR genes (63) and  
390 phenotypic resistance in *E.coli* isolates (33, 64) in unmedicated pigs, our initial expectation was  
391 that AMR gene abundances would markedly increase in response to antimicrobial administration  
392 as a result of selective pressure being exerted on specific gene subsets (65). In agreement with  
393 previous work, we showed high levels of all studied AMR genes in the non-medicated sow barn  
394 population, whilst prolonged exposure to three different in-feed antimicrobial regimens had no  
395 marked effect on AMR gene counts, potentially suggesting that they have reached saturation  
396 within the faecal bacterial populations (65). Curiously, the antimicrobials used (chlortetracycline  
397 and tylosin) were still clinically effective on this farm, suggesting that despite a high abundance  
398 of resistance genes within the faecal microbiome, that they were not present, or at least not active,

399 within the organisms of clinical interest, i.e. *Mycoplasma hyopneumoniae*, *Mycoplasma*  
400 *hyorhinis*, *Actinobacillus pleuropneumoniae* and *Lawsonia intracellularis*.

#### 401 **Changes in AMR gene abundances were not associated with antimicrobial exposure**

402 Our statistical models did demonstrate fluctuations in AMR gene abundance over time in both  
403 piglets and sows, however changes were not associated with antimicrobial administration. In fact,  
404 the largest increases in AMR gene abundance were seen across all genes and in both classes of  
405 stock at the same time, hence suggesting as yet undefined environmental influences on AMR gene  
406 abundance. A previous cross-sectional study highlighted that only 10-42% of the variation in  
407 AMR gene levels could be explained by factors included in statistical models (including lifetime  
408 antimicrobial exposure), suggesting that AMR gene levels are strongly influenced by a variety of  
409 other elements (16). Whilst these could be related to feed changes, the fact that the sows and  
410 piglets were housed differently and fed different diets (66) would suggest that this effect is due to  
411 some other factors affecting the entire farm, such as housing and management (62, 67, 68), ambient  
412 temperature (68) and/or humidity, changes in water supply or the introduction of an infectious  
413 agent.

#### 414 **Microbiome diversity was not affected by antimicrobial exposure**

415 Similar to the studied AMR genes, temporal changes were evident in alpha diversity indices in  
416 both sow barn and piglet accommodation samples. These changes were clearly more pronounced  
417 in the growing pigs, as the alpha diversity of the faecal microbiome increased from nursing to  
418 finishing, which has been shown previously (69, 70). However, changes associated with  
419 antimicrobial treatment were not observed. Previous work has demonstrated that sub-therapeutic  
420 administration of chlortetracycline and tylosin had no impact on alpha diversity indices (69, 71).

421 Whilst changes in relative abundances of specific taxa have been observed in response to tylosin  
422 administration, it was previously reported that these shifts were temporary, suggesting that the gut  
423 microbiota post-weaning seems to be resilient to perturbation by antimicrobial agents (69). Despite  
424 using markedly higher levels of chlortetracycline and tylosin (300 ppm and 100 ppm, respectively),  
425 our results also found that antimicrobial treatment did not impact on microbiome diversity in the  
426 growing piglets.

#### 427 **AMR gene abundances are high in nursing piglets with low microbiome diversity**

428 With respect to our second hypothesis, even when the piglet faecal microbiome was at its least  
429 diverse during the suckling period, the AMR gene levels were comparable to that of the nursing  
430 sows. Although microbiome diversity increased dramatically in the piglets during the first few  
431 weeks of life, as reflected in previous studies (69, 72–75), this was not associated with changes in  
432 AMR gene prevalence. We expected, as others have proposed, that changes in the microbiota  
433 would influence AMR gene levels (27, 66, 76), but in fact the high levels of studied AMR genes  
434 in the young piglets reflected that of the sows. The most obvious explanation for this is a  
435 combination of vertical and horizontal transmission of bacteria at or shortly after birth (31, 77).  
436 The presence of comparable levels of AMR genes in both sows and piglets and the associated large  
437 differences in microbiome diversity suggest that the AMR genes studied appear to either be  
438 widespread across multiple taxa or highly concentrated within dominant taxa present throughout  
439 all stages of microbiota development.

440

441

442 **Metagenomics revealed high AMR gene diversity and cross-class resistance genes in**  
443 **medicated pigs**

444 The shotgun metagenomics revealed a diverse set of AMR genes in the presence and absence of  
445 antimicrobial treatment, which reflects findings in other recent work (26). Specifically, genes  
446 associated with tetracycline and macrolide resistance predominated. This is not surprising given  
447 the history of high levels of tetracyclines and macrolide use on this farm. Reassuringly, there was  
448 no evidence of co-selection between antimicrobial classes following chlortetracycline or tylosin  
449 administration. This is a significant finding and relevant to the principles of antimicrobial  
450 stewardship, where veterinary surgeons are actively discouraged from using fluoroquinolones and  
451 3<sup>rd</sup>/4<sup>th</sup> generation cephalosporins, so as to minimise the risk that resistance to these critically  
452 important antibiotics in human medicine is selected for in livestock.

453 What was evident, were the large numbers of genes associated with cross-class resistance (CCR)  
454 in the piglet accommodation samples taken on W7 and W9 and how these reduced by W25 and  
455 were almost absent from the unmedicated sows. The presence of these genes was clearly not  
456 associated with the administration of chlortetracycline and tylosin in this study. Although the  
457 current study design does not allow us to disentangle temporal effects versus the effect of different  
458 treatments, it is interesting to note that the CCR genes were already highly abundant at W7,  
459 following a period of in-feed zinc administration and the use of acidified water. Copper and zinc  
460 salts are commonly administered in-feed at supranutritional levels due to their antimicrobial  
461 properties, with increasing doses of zinc oxide being previously shown to increase the abundance  
462 of both tetracycline and sulphonamide resistance genes in weaned pigs (78, 79).



463 The metagenomic sequencing results for the sow barn on W9 were unexpected. All three biological  
464 replicates demonstrated an increase in the proportion of reads associated with sulphonamide and  
465 aminoglycoside resistance. The diversity of AMR genes also doubled at this time point compared  
466 to W7, despite no antimicrobial administration to this group of pigs. An increase in AMR gene  
467 diversity was also seen in the piglet accommodation at the same time point, however the increase  
468 was seen in beta-lactam resistance genes, CCR genes and genes associated with other antimicrobial  
469 classes. This is unlikely to be an artefact, given that this observation was seen across two different  
470 locations at the same time and five of the six biological replicates. As with the qPCR results  
471 discussed above, this shift appears to be a consequence of an undefined environmental factor  
472 affecting the whole farm, however in this instance, the two groups of pigs are responding with  
473 different increases in gene diversity.

#### 474 **Persistently high abundances of AMR genes after partial depopulation**

475 The partial depopulation at the end of the study involved considerable antibiotic use, with every  
476 sow on the farm receiving in-feed tiamulin and chlortetracycline. The treated sows were followed  
477 for five months after this treatment, during a period where antibiotic use on the farm declined  
478 nearly twenty-fold. Despite such dramatic changes in antibiotic usage, there were no marked  
479 changes in AMR gene abundances. This therefore begs the question as to how long, if ever, it  
480 would take to see reductions in AMR gene levels following the reduction or cessation of  
481 antimicrobial use on farms with a previous history of high-level use.

#### 482 **AMR genes as environmental ‘pollutants’**

483 We also found that the AMR gene levels in the environmental samples at the furthest points from  
484 the farm were still markedly higher when compared to urban and non-livestock environmental

485 soils. Spreading pig slurry onto fields is a potential route of transferring AMR genes into the  
486 environment and from pigs to humans, as the AMR gene levels in soil are increased (80, 81). The  
487 surrounding fields, from which we obtained several samples, had been spread with slurry one week  
488 earlier from the unit, which most likely had a role in elevating the AMR gene counts at these  
489 locations. Previous studies have shown the persistence of resistant bacteria originating from slurry  
490 for 300 days (81) and even up to 18 months (82), with markedly higher levels in agricultural soils  
491 than comparator soils (81–84). Our findings, combined with that from previous research, suggest  
492 that the farm is acting as a reservoir of AMR genes.

### 493 **Policy implications**

494 The results of this study imply that once AMR genes become established within the microbiome,  
495 modest changes in antimicrobial use are unlikely to result in a significant reduction in gene  
496 carriage. Furthermore, once established, the continued use of the antimicrobials against which  
497 these genes confer resistance, is unlikely to make the situation with respect to AMR gene  
498 dissemination any worse. The priority should therefore be to prevent resistance becoming  
499 established to antimicrobial classes of critical importance to human health i.e. 3<sup>rd</sup>/4<sup>th</sup> generation  
500 cephalosporins and fluoroquinolones. More generally, attempting to refine existing antimicrobial  
501 treatment regimens offers limited scope for reducing AMR gene carriage. Efforts to combat  
502 antimicrobial resistance should therefore focus on removing the necessity for widespread  
503 antimicrobial administration to livestock, which includes pursuing high health status herds,  
504 improved management, optimised nutrition and enhanced immune function.

505

506 **Conclusion**

507 AMR gene abundance and diversity on this unit were high in both medicated and unmedicated  
508 pigs, likely as a consequence of prolonged antimicrobial usage, with the farm acting as a point  
509 source of AMR genes. In this context, in-feed antibiotic (chlortetracycline and tylosin)  
510 administration did not affect AMR gene abundance or diversity. Acidified water and zinc  
511 supplementation were linked to an increase in AMR gene diversity, which importantly included  
512 CCR genes, which decayed quickly after their withdrawal. The implications of this work are that  
513 AMR genes that are already established within the microbiome are likely to decay only slowly (if  
514 at all) following antimicrobial withdrawal and so efforts should focus on avoiding the use of  
515 critically important antimicrobials, where high levels of resistance are not already established. This  
516 study did not identify which bacteria carried these AMR genes or indeed which genes were being  
517 expressed. Future work therefore needs to determine in what organisms these genes are not only  
518 present, but also active.

519

520 **Funding Information**

521 Funding for this study was provided by the UK Research and Innovation (UKRI) AMR Cross  
522 Council Initiative, administered by the Natural Environment Research Council (NERC reference:  
523 NE/N020162/1) (Principal Investigator: Dr Alexander Corbishley). DG receives core strategic  
524 funding to The Roslin Institute from the BBSRC (BB/J004227/1). AM is supported by a BBSRC  
525 Future Leadership Fellowship (BB/P007767/1). MH receives support from the Scottish  
526 Government.

527 **Acknowledgements**

528 The authors would like to thank the farm manager, staff on the study farm and their veterinary  
529 surgeons for their support and assistance throughout the sample and data collection phase of this  
530 project.

531

## 532 **References**

- 533 1. Medardus JJ, Molla BZ, Nicol M, Morrow WM, Rajala-Schultz PJ, Kazwala R, Gebreyes  
534 WA. 2014. In-feed use of heavy metal micronutrients in U.S. swine production systems and  
535 its role in persistence of multidrug-resistant salmonellae. *Appl Environ Microbiol* 80:2317–  
536 2325.
- 537 2. Singer RS, Reid-Smith R, Sisco WM. 2006. Stakeholder position paper: Epidemiological  
538 perspectives on antibiotic use in animals. *Prev Vet Med* 73:153–161.
- 539 3. Boeckel TP Van, Brower C, Gilbert M, Grenfell BT, Levin SA. 2015. Global trends in  
540 antimicrobial use in food animals. *PN* 112:1–6.
- 541 4. Bengtsson-Palme J, Kristiansson E, Larsson DGJ. 2018. Environmental factors influencing  
542 the development and spread of antibiotic resistance. *FEMS Microbiol Rev* 42:68–80.
- 543 5. Witte W. 2000. Selective pressure by antibiotic use in livestock. *Int J Antimicrob Agents*  
544 16:19–24.
- 545 6. Novais C, Freitas AR, Silveira E, Antunes P, Silva R, Coque TM, Peixe L. 2013. Spread of  
546 multidrug-resistant enterococcus to animals and humans: An underestimated role for the pig  
547 farm environment. *J Antimicrob Chemother* 68:2746–2754.
- 548 7. Smith TC, Sreevatsan S, Gebreyes WA, Forshey BM, Thiruvengadam M, Davies PR, Male  
549 MJ, Thakur S, Martin HW, Harper AL, Abley MJ, Molla BZ. 2013. Methicillin-Resistant  
550 *Staphylococcus aureus* in Pigs and Farm Workers on Conventional and Antibiotic-Free  
551 Swine Farms in the USA. *PLoS One* 8:e63704.
- 552 8. Khanna T, Friendship R, Dewey C, Weese JS. 2008. Methicillin resistant *Staphylococcus*

- 553 aureus colonization in pigs and pig farmers. *Vet Microbiol* 128:298–303.
- 554 9. Su JQ, Wei B, Ou-Yang WY, Huang FY, Zhao Y, Xu HJ, Zhu YG. 2015. Antibiotic  
555 Resistome and Its Association with Bacterial Communities during Sewage Sludge  
556 Composting. *Environ Sci Technol* 49:7356–7363.
- 557 10. Calero-Cáceres W, Melgarejo A, Colomer-Lluch M, Stoll C, Lucena F, Jofre J, Muniesa M.  
558 2014. Sludge as a potential important source of antibiotic resistance genes in both the  
559 bacterial and bacteriophage fractions. *Environ Sci Technol* 48:7602–7611.
- 560 11. O’Neill J. 2015. Antimicrobials in agriculture and the environment: Reducing unnecessary  
561 use and waste. *The Review on Antimicrobial Resistance*.
- 562 12. European Medicines Agency. 2018. Sales of veterinary antimicrobial agents in 30 European  
563 countries in 2016.
- 564 13. Chantziaras I, Boyen F, Callens B, Dewulf J. 2014. Correlation between veterinary  
565 antimicrobial use and antimicrobial resistance in food-producing animals: A report on seven  
566 countries. *J Antimicrob Chemother* 69:827–834.
- 567 14. UK-VARSS. 2018. UK Veterinary Antibiotic Resistance and Sales Surveillance Report  
568 (UK-VARSS 2017). New Haw, Addlestone.
- 569 15. Davies P, Remnant JG, Green MJ, Gascoigne E, Gibbon N, Hyde R, Porteous JR, Schubert  
570 K, Lovatt F, Corbishley A. 2017. Quantitative analysis of antibiotic usage in British sheep  
571 flocks. *Vet Rec* 181:511.
- 572 16. Birkegård AC, Halasa T, Græsbøll K, Clasen J, Folkesson A, Toft N. 2017. Association  
573 between selected antimicrobial resistance genes and antimicrobial exposure in Danish pig

- 574 farms. *Sci Rep* 7:1–8.
- 575 17. Sarrazin S, Joosten P, Van Gompel L, Luiken REC, Mevius DJ, Wagenaar JA, Heederik  
576 DJJ, Dewulf J. 2019. Quantitative and qualitative analysis of antimicrobial usage patterns  
577 in 180 selected farrow-to-finish pig farms from nine European countries based on single  
578 batch and purchase data. *J Antimicrob Chemother* 74:807–816.
- 579 18. Lugsomya K, Hampson DJ, Niyomtham W, Tummaruk P, Yindee J, Tribuddharat C,  
580 Prapasarakul N. 2018. Antimicrobial Resistance in Commensal *Escherichia coli* Isolated  
581 from Pigs and Pork Derived from Farms Either Routinely Using or Not Using In-Feed  
582 Antimicrobials. *Microb Drug Resist* 24:1054–1066.
- 583 19. Dunlop RH, McEwen SA, Meek AH, Clarke RC, Black WD, Friendship RM. 1998.  
584 Associations among antimicrobial drug treatments and antimicrobial resistance of fecal  
585 *Escherichia coli* of swine on 34 farrow-to-finish farms in Ontario, Canada. *Prev Vet Med*  
586 34:283–305.
- 587 20. Quintana-Hayashi MP, Thakur S. 2012. Longitudinal Study of the Persistence of  
588 Antimicrobial-Resistant *Campylobacter* Strains in Distinct Swine Production Systems on  
589 Farms, at Slaughter, and in the Environment. *Appl Environ Microbiol* 78:2698–2705.
- 590 21. Bednorz C, Oelgeschläger K, Kinnemann B, Hartmann S, Neumann K, Pieper R, Bethe A,  
591 Semmler T, Tedin K, Schierack P, Wieler LH, Guenther S. 2013. The broader context of  
592 antibiotic resistance: Zinc feed supplementation of piglets increases the proportion of multi-  
593 resistant *Escherichia coli* in vivo. *Int J Med Microbiol* 303:396–403.
- 594 22. Amachawadi RG, Shelton NW, Shi X, Vinasco J, Dritz SS, Tokach MD, Nelssen JL, Scott

- 595 HM, Nagaraja TG. 2011. Selection of Fecal Enterococci Exhibiting tcrB -Mediated Copper  
596 Resistance in Pigs Fed Diets Supplemented with Copper . *Appl Environ Microbiol* 77:5597–  
597 5603.
- 598 23. Cavaco LM, Hasman H, Stegger M, Andersen PS, Skov R, Fluit AC, Ito T, Aarestrup FM.  
599 2010. Cloning and occurrence of czrC, a gene conferring cadmium and zinc resistance in  
600 methicillin-resistant *Staphylococcus aureus* CC398 isolates. *Antimicrob Agents Chemother*  
601 54:3605–3608.
- 602 24. Aarestrup FM, Cavaco L, Hasman H. 2010. Decreased susceptibility to zinc chloride is  
603 associated with methicillin resistant *Staphylococcus aureus* CC398 in Danish swine. *Vet*  
604 *Microbiol* 142:455–457.
- 605 25. Munk P, Heederik D, Lund O, Wagenaar JA, Hansen RB, Schmitt H, Petersen TN, Duarte  
606 ASR, Luiken REC, Vigre H, Lukjancenko O, Pamp SJ, Bossers A, Knudsen BE, Van  
607 Gompel L, Mevius D, Garcia AD, Hald T, Smit LAM, Ruppé E, Aarestrup FM. 2018.  
608 Abundance and diversity of the faecal resistome in slaughter pigs and broilers in nine  
609 European countries. *Nat Microbiol* 3:898–908.
- 610 26. Ghanbari M, Klose V, Crispie F, Cotter PD. 2019. The dynamics of the antibiotic resistome  
611 in the feces of freshly weaned pigs following therapeutic administration of oxytetracycline.  
612 *Sci Rep* 9:1–11.
- 613 27. Birkegård AC, Folkesson A, Clasen J, Græsbøll K, Halasa T, Toft N. 2018. Persistence of  
614 antimicrobial resistance genes from sows to finisher pigs. *Prev Vet Med* 149:10–14.
- 615 28. Burow E, Simoneit C, Tenhagen BA, Käsbohrer A. 2014. Oral antimicrobials increase



- 616 antimicrobial resistance in porcine *E. coli* - A systematic review. *Prev Vet Med* 113:364–  
617 375.
- 618 29. Cameron-Veas K, Fraile L, Napp S, Garrido V, Grilló MJ, Migura-Garcia L. 2018.  
619 Multidrug resistant *Salmonella enterica* isolated from conventional pig farms using  
620 antimicrobial agents in preventative medicine programmes. *Vet J* 234:36–42.
- 621 30. Randall LP, Horton RA, Lemma F, Martelli F, Duggett NAD, Smith RP, Kirchner MJ, Ellis  
622 RJ, Rogers JP, Williamson SM, Simons RRL, Brena CM, Evans SJ, Anjum MF, Teale CJ.  
623 2018. Longitudinal study on the occurrence in pigs of colistin-resistant *Escherichia coli*  
624 carrying *mcr-1* following the cessation of use of colistin. *J Appl Microbiol* 125:596–608.
- 625 31. Marchant M, Moreno MA. 2012. Dynamics and diversity of *Escherichia coli* in animals and  
626 system management of the manure on a commercial farrow-to-finish pig farm. *Appl*  
627 *Environ Microbiol* 79:853–859.
- 628 32. Alali WQ, Lawhorn DB, Norby B, Harvey RB, Scott HM, Pillai SD. 2008. Longitudinal  
629 Study of Antimicrobial Resistance among *Escherichia coli* Isolates from Integrated  
630 Multisite Cohorts of Humans and Swine. *Appl Environ Microbiol* 74:3672–3681.
- 631 33. Agga GE, Scott HM, Amachawadi RG, Nagaraja TG, Vinasco J, Bai J, Norby B, Renter  
632 DG, Dritz SS, Nelssen JL, Tokach MD. 2014. Effects of chlortetracycline and copper  
633 supplementation on antimicrobial resistance of fecal *Escherichia coli* from weaned pigs.  
634 *Prev Vet Med* 114:231–246.
- 635 34. Funk JA, Lejeune JT, Wittum TE, Rajala-Schultz PJ. 2006. The Effect of Subtherapeutic  
636 Chlortetracycline on Antimicrobial Resistance in the Fecal Flora of Swine. *Microb Drug*

- 637 Resist 12:210–218.
- 638 35. Schmidt GV, Møllerup A, Christiansen LE, Ståhl M, Olsen JE, Angen Ø. 2015. Sampling  
639 and pooling methods for capturing herd level antibiotic resistance in swine feces using  
640 qPCR and CFU approaches. PLoS One 10:1–22.
- 641 36. Ng LK, Martin I, Alfa M, Mulvey M. 2001. Multiplex PCR for the detection of tetracycline  
642 resistant genes. Mol Cell Probes 15:209–215.
- 643 37. Aminov RI. 2001. Molecular Ecology of Tetracycline Resistance: Development and  
644 Validation of Primers for Detection of Tetracycline Resistance Genes Encoding Ribosomal  
645 Protection Proteins Downloaded from <http://aem.asm.org/> on April 27, 2017 by SERIALS  
646 CONTROL Lane Medic 67:22–32.
- 647 38. Šeputiene V, Povilonis J, Ružauskas M, Pavilonis A, Sužiedeliene E. 2010. Prevalence of  
648 trimethoprim resistance genes in Escherichia coli isolates of human and animal origin in  
649 Lithuania. J Med Microbiol 59:315–322.
- 650 39. Kern MB. 2002. Susceptibility of Danish Escherichia coli strains isolated from urinary tract  
651 infections and bacteraemia, and distribution of sul genes conferring sulphonamide  
652 resistance. J Antimicrob Chemother 50:513–516.
- 653 40. Perreten V, Boerlin P. 2003. A New Sulfonamide Resistance Gene (sdfA). Antimicrob Agents  
654 Chemother 47:1169–1172.
- 655 41. Sutcliffe J, Grebe T, Tait-Kamradt A, Wondrack L. 1996. Detection of erythromycin-  
656 resistant determinants by PCR. Antimicrob Agents Chemother 40:2562–2566.
- 657 42. Martínez-Martínez L, Torres C, Carattoli A, Vinué L, Ruiz del Castillo B, Román EJ,

- 658 Guerra B. 2013. Molecular characterization of multiresistant *Escherichia coli* producing or  
659 not extended-spectrum  $\beta$ -lactamases. *BMC Microbiol* 13:84.
- 660 43. Ciesielczuk H, Hornsey M, Choi V, Woodford N, Wareham DW. 2013. Development and  
661 evaluation of a multiplex PCR for eight plasmid-mediated quinolone-resistance  
662 determinants. *J Med Microbiol* 62:1823–1827.
- 663 44. Cattoir V, Poirel L, Rotimi V, Soussy CJ, Nordmann P. 2007. Multiplex PCR for detection  
664 of plasmid-mediated quinolone resistance *qnr* genes in ESBL-producing enterobacterial  
665 isolates. *J Antimicrob Chemother* 60:394–397.
- 666 45. Chen S, Zhao S, White DG, Carl M, Lu R, Yang H, Mcdermott PF, Schroeder CM, Ayers  
667 S. 2004. Characterization of *Salmonella* Serovars Isolated from Retail Meats. *Appl Environ*  
668 *Microbiol* 70:1–7.
- 669 46. Chen J, Yu Z, Michel FC, Wittum T, Morrison M. 2007. Development and application of  
670 real-time PCR assays for quantification of *erm* genes conferring resistance to macrolides-  
671 lincosamides-streptogramin B in livestock manure and manure management systems. *Appl*  
672 *Environ Microbiol* 73:4407–4416.
- 673 47. Shoemaker NB, Vlamakis H, Hayes K, Salyers AA, Jensen LB, Hammerum AM, Westh H.  
674 2001. Evidence for Extensive Resistance Gene Transfer among 67:561–568.
- 675 48. Maeda H, Fujimoto C, Haruki Y, Maeda T, Kokeguchi S, Petelin M, Arai H, Tanimoto I,  
676 Nishimura F, Takashiba S. 2003. Quantitative real-time PCR using TaqMan and SYBR  
677 Green for *Actinobacillus actinomycetemcomitans*, *Porphyromonas gingivalis*, *Prevotella*  
678 *intermedia*, *tetQ* gene and total bacteria. *FEMS Immunol Med Microbiol* 39:81–86.

- 679 49. Böckelmann U, Dörries HH, Ayuso-Gabella MN, De Marçay MS, Tandoi V, Levantesi C,  
680 Masciopinto C, Houtte E Van, Szewzyk U, Wintgens T, Grohmann E. 2009. Quantitative  
681 PCR monitoring of antibiotic resistance genes and bacterial pathogens in three european  
682 artificial groundwater recharge systems. *Appl Environ Microbiol* 75:154–163.
- 683 50. Clifford RJ, Milillo M, Prestwood J, Quintero R, Zurawski D V., Kwak YI, Waterman PE,  
684 Lesho EP, Mc Gann P. 2012. Detection of bacterial 16S rRNA and identification of four  
685 clinically important bacteria by real-time PCR. *PLoS One* 7:7–12.
- 686 51. Pollock J, Gally DL, Glendinning L, Tiwari R, Hutchings MR, Houdijk JGM. 2018.  
687 Analysis of temporal fecal microbiota dynamics in weaner pigs with and without exposure  
688 to enterotoxigenic *Escherichia coli*. *J Anim Sci* 96:3777–3790.
- 689 52. Consortium TSGS. 2017. *Sus scrofa* 11.1 (Genome Assembly).
- 690 53. NCBI. Enterobacteria phage phiX174 sensu lato (Genome Assembly).
- 691 54. Comeau AM, Douglas GM, Langille MGI. 2017. Microbiome Helper: a Custom and  
692 Streamlined Workflow for Microbiome Research. *mSystems* 2:1–11.
- 693 55. Bolger AM, Lohse M, Usadel B. 2014. Trimmomatic: A flexible trimmer for Illumina  
694 sequence data. *Bioinformatics* 30:2114–2120.
- 695 56. Ruiz J, Rovira P, Jones KL, Morley PS, Abdo Z, Ross AS, Noyes NR, Boucher C, Lakin  
696 SM, Belk KE, Dettenwanger A, Dean C, Doster E. 2017. MEGARes: an antimicrobial  
697 resistance database for high throughput sequencing. *Nucleic Acids Res* 45:D574–D580.
- 698 57. Li H, Durbin R. 2009. Fast and accurate long-read alignment with Burrows-Wheeler  
699 transform. *Bioinformatics* 26:589–595.

- 700 58. Franzosa EA, McIver LJ, Rahnavaard G, Thompson LR, Schirmer M, Weingart G, Lipson  
701 KS, Knight R, Caporaso JG, Segata N, Huttenhower C. 2018. Species-level functional  
702 profiling of metagenomes and metatranscriptomes. *Nat Methods* 15:962–968.
- 703 59. R Core Team. 2019. R: A language and environment for statistical computing.
- 704 60. Wickham H. 2016. *ggplot2: Elegant Graphics for Data Analysis*.
- 705 61. Veterinary Medicines Directorate. 2014. UK Veterinary Antibiotic Resistance and Sales  
706 Surveillance Report.
- 707 62. Van Gompel L, Luiken REC, Sarrazin S, Munk P, Knudsen BE, Hansen RB, Bossers A,  
708 Aarestrup FM, Dewulf J, Wagenaar JA, Mevius DJ, Schmitt H, Heederik DJJ, Dorado-  
709 García A, Smit LAM, Graveland H, van Essen A, Gonzalez-Zorn B, Moyano G, Sanders P,  
710 Chauvin C, David J, Battisti A, Caprioli A, Blaha T, Wadepohl K, Brandt M, Hald T, Duarte  
711 ASR, Wasyl D, Skarżyńska M, Zajac M, Hoszowski A, Daskalov H, Saatkamp HW, Stärk  
712 KDC. 2019. The antimicrobial resistome in relation to antimicrobial use and biosecurity in  
713 pig farming, a metagenome-wide association study in nine European countries. *J*  
714 *Antimicrob Chemother* 74:865–876.
- 715 63. Looft T, Allen HK. 2012. Collateral effects of antibiotics on mammalian gut microbiomes.  
716 *Gut Microbes* 3:463–467.
- 717 64. Cameron-Veas K, Moreno MA, Fraile L, Migura-Garcia L. 2016. Shedding of  
718 cephalosporin resistant *Escherichia coli* in pigs from conventional farms after early  
719 treatment with antimicrobials. *Vet J* 211:21–25.
- 720 65. Michael C, Franks A, Labbate M. 2016. The antimicrobial resistance crisis: management

- 721 through gene monitoring. *Open Biol* 6.
- 722 66. Jensen AN, Hansen LL, Baggesen DL, Mølbak L. 2013. Effects of feeding finisher pigs  
723 with chicory or lupine feed for one week or two weeks before slaughter with respect to  
724 levels of Bifidobacteria and Campylobacter. *Animal* 7:66–74.
- 725 67. Dewulf J, Catry B, Timmerman T, Opsomer G, de Kruif A, Maes D. 2007. Tetracycline-  
726 resistance in lactose-positive enteric coliforms originating from Belgian fattening pigs:  
727 Degree of resistance, multiple resistance and risk factors. *Prev Vet Med* 78:339–351.
- 728 68. Mathew AG, Arnett DB, Cullen P, Ebner PD. 2003. Characterization of resistance patterns  
729 and detection of apramycin resistance genes in *Escherichia coli* isolated from swine exposed  
730 to various environmental conditions. *Int J Food Microbiol* 89:11–20.
- 731 69. Holman DB, Chénier MR. 2014. Temporal changes and the effect of subtherapeutic  
732 concentrations of antibiotics in the gut microbiota of swine. *FEMS Microbiol Ecol* 90:599–  
733 608.
- 734 70. Niu Q, Li P, Hao S, Zhang Y, Kim SW, Li H, Ma X, Gao S, He L, Wu W, Huang X, Hua  
735 J, Zhou B, Huang R. 2015. Dynamic distribution of the gut microbiota and the relationship  
736 with apparent crude fiber digestibility and growth stages in pigs. *Sci Rep* 5:1–7.
- 737 71. Kim HB, Borewicz K, White BA, Singer RS, Sreevatsan S, Tu ZJ, Isaacson RE. 2012.  
738 Microbial shifts in the swine distal gut in response to the treatment with antimicrobial  
739 growth promoter, tylosin. *Proc Natl Acad Sci* 109:15485–15490.
- 740 72. De Rodas B, Youmans BP, Danzeisen JL, Tran H, Johnson TJ. 2018. Microbiome profiling  
741 of commercial pigs from farrow to finish. *J Anim Sci* 96:1778–1794.

- 742 73. Chen L, Xu Y, Chen X, Fang C, Zhao L, Chen F. 2017. The maturing development of gut  
743 microbiota in commercial piglets during the weaning transition. *Front Microbiol* 8:1–13.
- 744 74. Frese SA, Parker K, Calvert CC, Mills DA. 2015. Diet shapes the gut microbiome of pigs  
745 during nursing and weaning. *Microbiome* 3:28.
- 746 75. Pajarillo E, Chae JP, M PB, Kim H, Kang DK. 2014. Assessment of fecal bacterial diversity  
747 among healthy piglets during the weaning transition. *J Gen Appl Microbiol* 60:140–146.
- 748 76. Lanza VF, Tedim AP, Martínez JL, Baquero F, Coque TM. 2015. The Plasmidome of  
749 Firmicutes: Impact on the Emergence and the Spread of Resistance to Antimicrobials.  
750 *Microbiol Spectr* 3:1–37.
- 751 77. Sekirov I, Russell SL, Antunes LCM, Finlay BB. 2010. Gut Microbiota in Health and  
752 Disease. *Physiol Rev* 859–904.
- 753 78. Vahjen W, Pietruszyńska D, Starke IC, Zentek J. 2015. High dietary zinc supplementation  
754 increases the occurrence of tetracycline and sulfonamide resistance genes in the intestine of  
755 weaned pigs. *Gut Pathog* 7:3–7.
- 756 79. Mazaheri Nezhad Fard R, Heuzenroeder MW, Barton MD. 2011. Antimicrobial and heavy  
757 metal resistance in commensal enterococci isolated from pigs. *Vet Microbiol* 148:276–282.
- 758 80. Agersø Y, Munk P, Andersen VD, De Knecht L V., Aarestrup FM, Vigre H, Jensen MS.  
759 2017. The association between measurements of antimicrobial use and resistance in the  
760 faeces microbiota of finisher batches. *Epidemiol Infect* 145:2827–2837.
- 761 81. Sengeløv G, Agersø Y, Halling-Sørensen B, Baloda SB, Andersen JS, Jensen LB. 2003.  
762 Bacterial antibiotic resistance levels in Danish farmland as a result of treatment with pig

- 763 manure slurry. *Environ Int* 28:587–595.
- 764 82. Ghosh S, LaPara TM. 2007. The effects of subtherapeutic antibiotic use in farm animals on  
765 the proliferation and persistence of antibiotic resistance among soil bacteria. *ISME J* 1:191–  
766 203.
- 767 83. Yang F, Zhang K, Zhi S, Li J, Tian X, Gu Y, Zhou J. 2019. High prevalence and  
768 dissemination of  $\beta$ -lactamase genes in swine farms in northern China. *Sci Total Environ*  
769 651:2507–2513.
- 770 84. Zhu Y-G, Johnson TA, Su J-Q, Qiao M, Guo G-X, Stedtfeld RD, Hashsham SA, Tiedje JM.  
771 2013. Diverse and abundant antibiotic resistance genes in Chinese swine farms. *Proc Natl*  
772 *Acad Sci* 110:3435–3440.
- 773
- 774



775 **Table 1 – Summary of statistical model outputs (F-statistics and P-values) for assessing**  
 776 **temporal shifts in gene abundances and microbiome diversity. ISI = Inverse Simpson**  
 777 **Index. SI = Shannon Index.**

|                 | Sow barn    |         | Piglet accommodation |         |
|-----------------|-------------|---------|----------------------|---------|
|                 | F-statistic | P-value | F-statistic          | P-value |
| <i>tetB</i>     | 12.16       | < 0.001 | 2.05                 | 0.030   |
| <i>tetQ</i>     | 11.83       | < 0.001 | 5.60                 | < 0.001 |
| <i>ermA</i>     | 7.19        | < 0.001 | 2.01                 | 0.034   |
| <i>ermB</i>     | 30.02       | < 0.001 | 8.94                 | < 0.001 |
| <i>dfrA1</i>    | 20.69       | < 0.001 | 2.59                 | 0.006   |
| <b>16S rRNA</b> | 13.30       | < 0.001 | 4.84                 | < 0.001 |
| <b>ISI</b>      | 5.63        | < 0.001 | 1.79                 | 0.065   |
| <b>SI</b>       | 5.79        | < 0.001 | 1.78                 | 0.065   |

778  
 779 **Figure 1 – Summary of pig production cycle, antimicrobial administration and sampling**  
 780 **points.** Faecal sampling (red arrows) was carried out from farrowing pens containing the pregnant  
 781 sows only (W1), and then post-farrowing from both the sow and the piglets during co-housing  
 782 (W2-W4). Weaners were mixed and moved into new accommodation prior to sampling on W5  
 783 and were moved to larger accommodation for the growing/finishing period prior to sampling on  
 784 W14. Samples subject to metagenomic sequencing are indicated (Meta 1 to Meta 3).

785 **Figure 2 – Quantification of AMR genes.** AMR gene copy numbers in faecal samples obtained  
786 from the (A) piglet accommodation, (B) sow barn including the partial depopulation and (C) local  
787 environment, including slurry and soils obtained from non-agricultural sites in Scotland.

788 **Figure 3 – Alpha diversity indices of the faecal microbiota.** The Inverse Simpson and Shannon  
789 indices of the faecal microbiomes obtained from the piglet accommodation and sow barn samples.  
790 On W1, faecal samples were obtained from pregnant sows only (n = 6) and on W2-4, faecal drops  
791 were obtained from both nursing sows (n = 6) and piglets (n = 6) during co-housing.

792 **Figure 4 – AMR gene abundance and diversity described by metagenomic data.** (A) Log-  
793 transformed normalised gene abundance counts from both the sow barn and piglet accommodation  
794 (each bar is the sum of nine samples), (B) relative abundances of genes conferring resistance to  
795 particular antibiotic classes and (C) the sum of the absolute read counts from the three replicate  
796 samples conferring resistance to particular antibiotic classes.

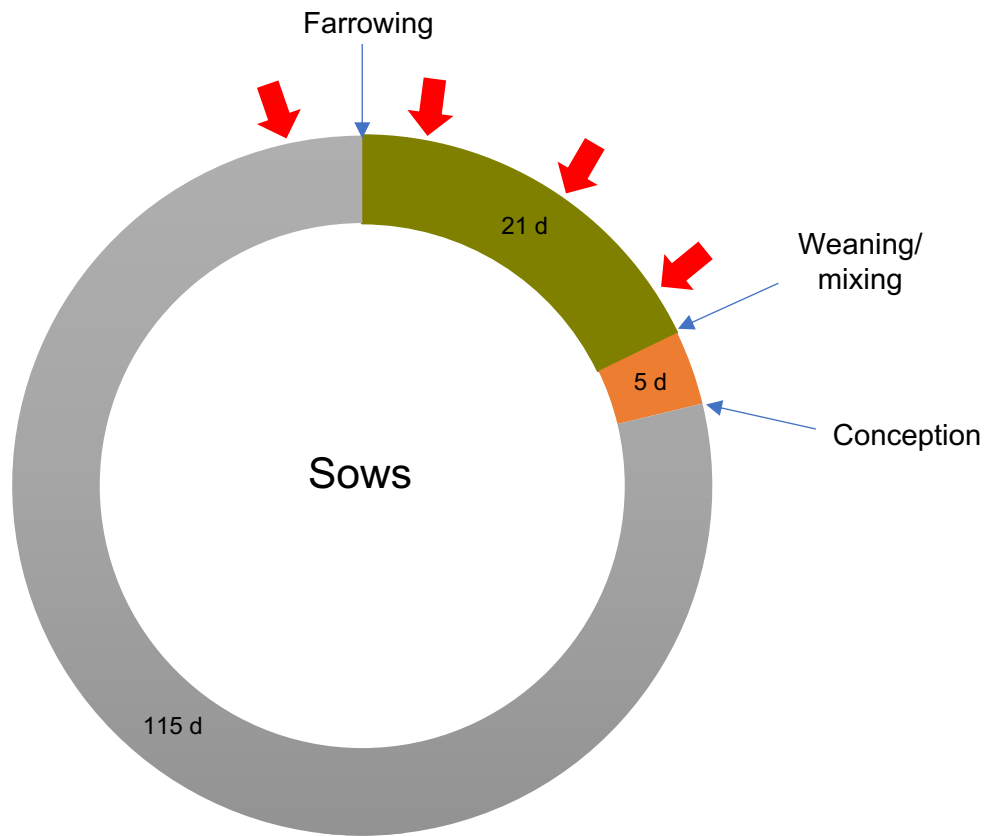

- N Nursing
- P Non-productive
- F Pregnant (dry)
- R Weaners
- F Growers/finishers

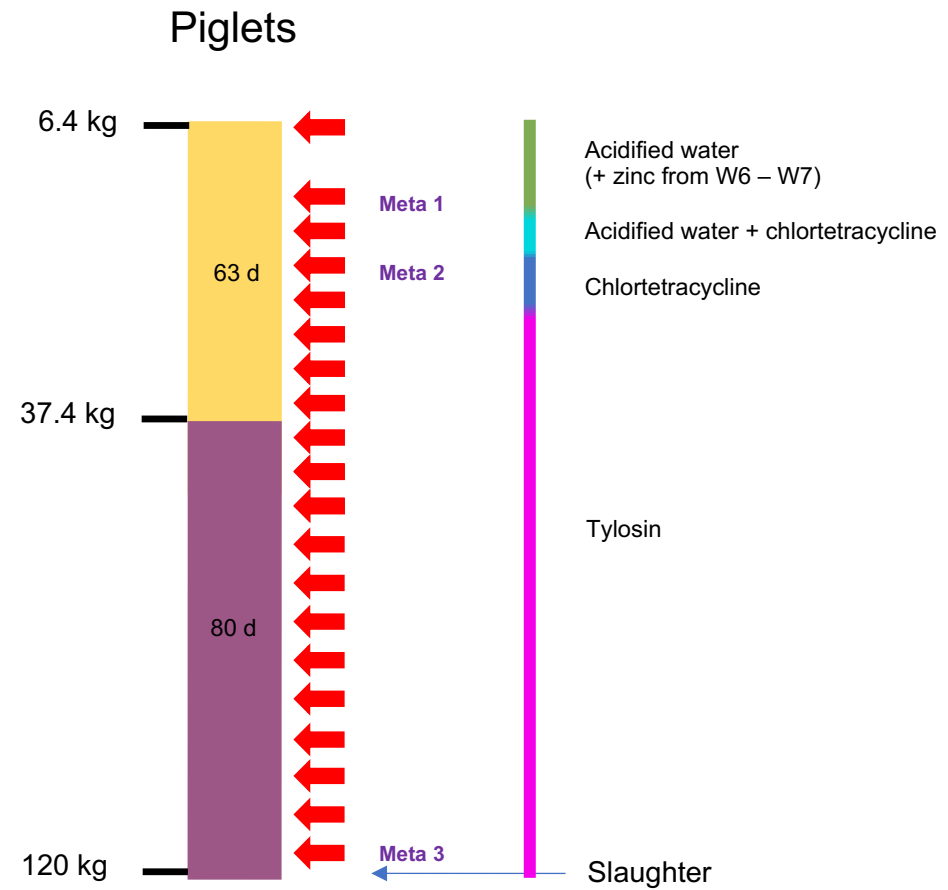

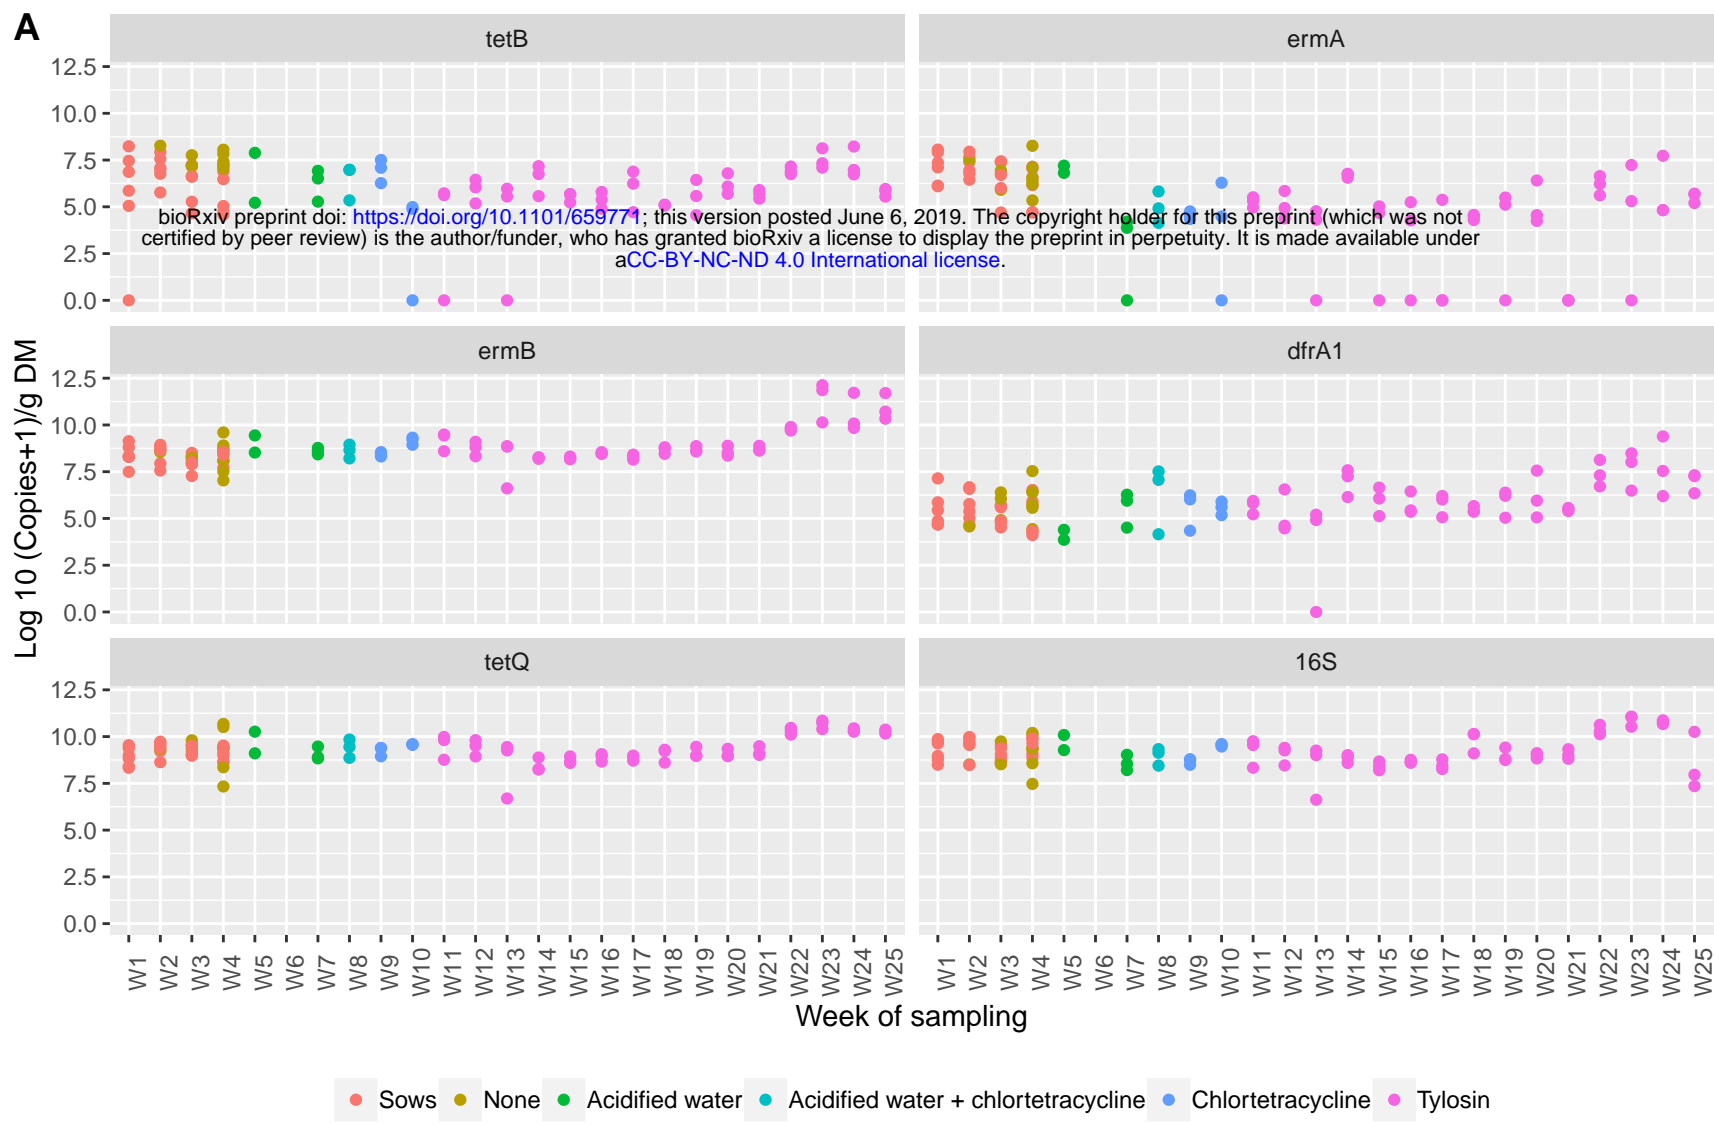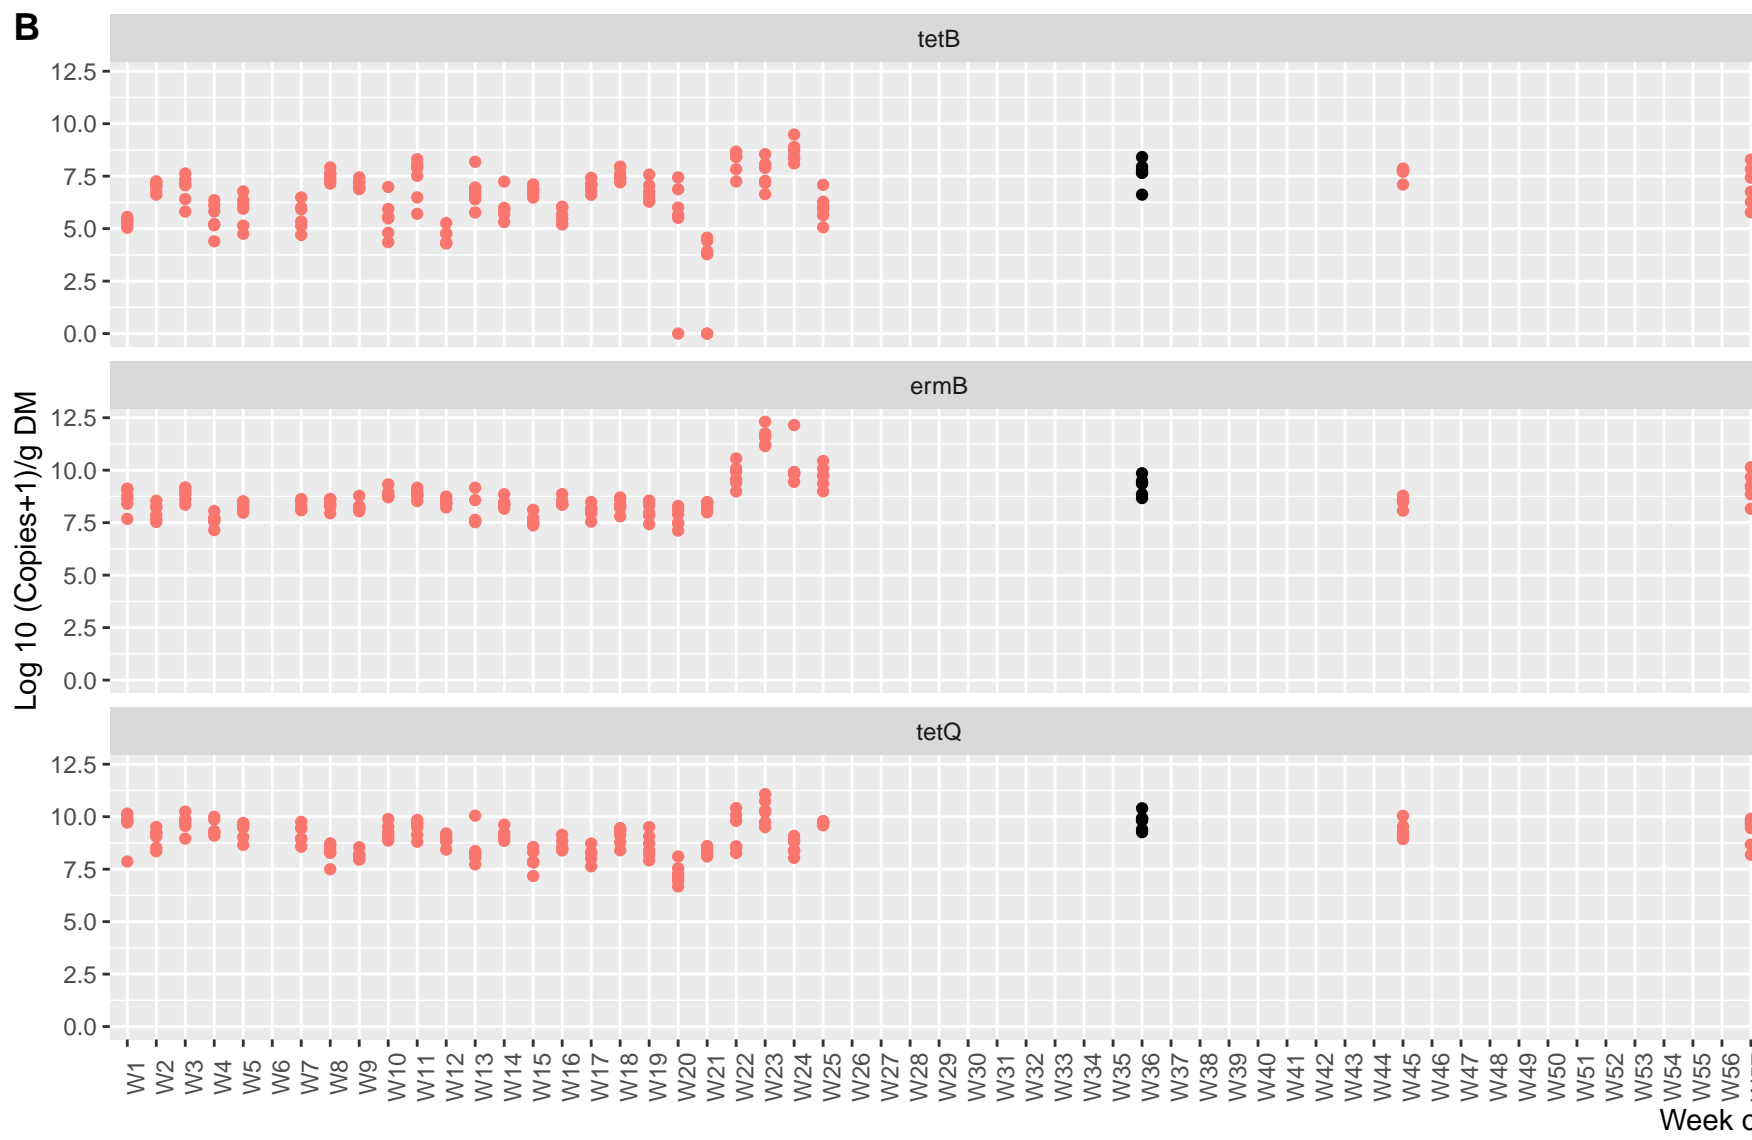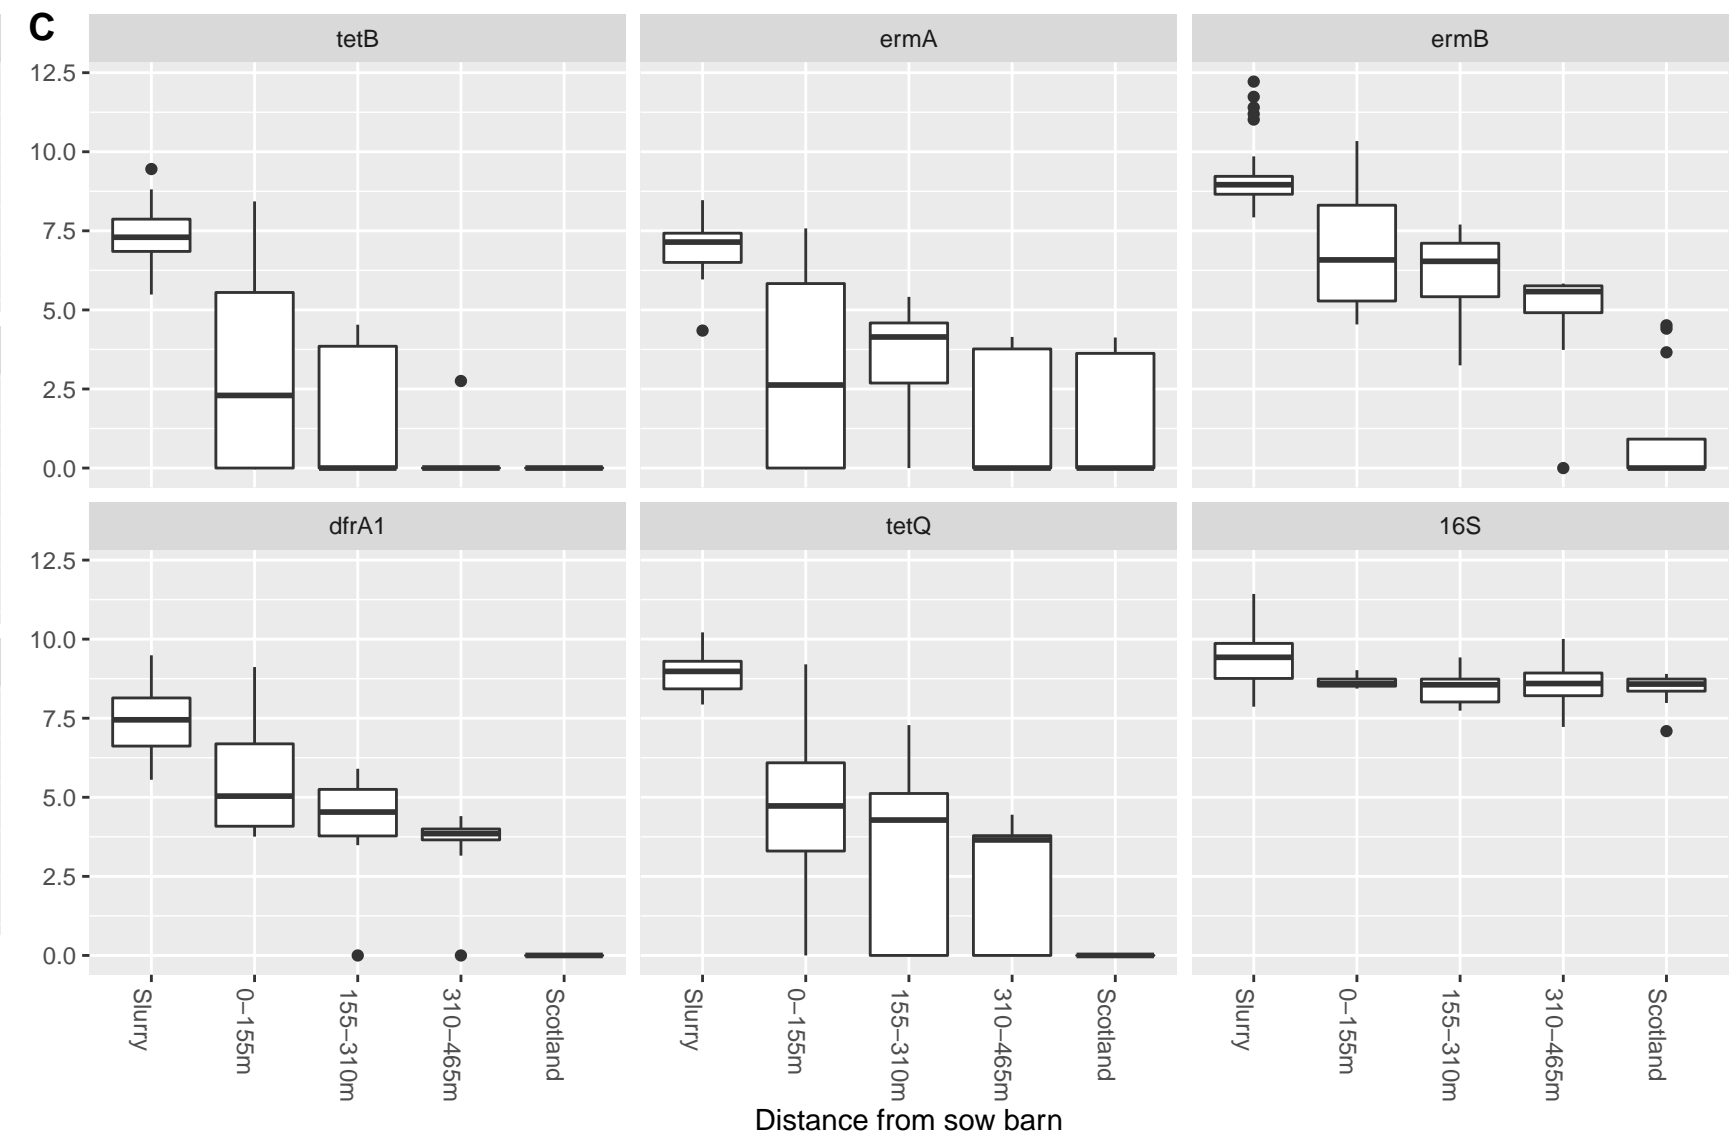

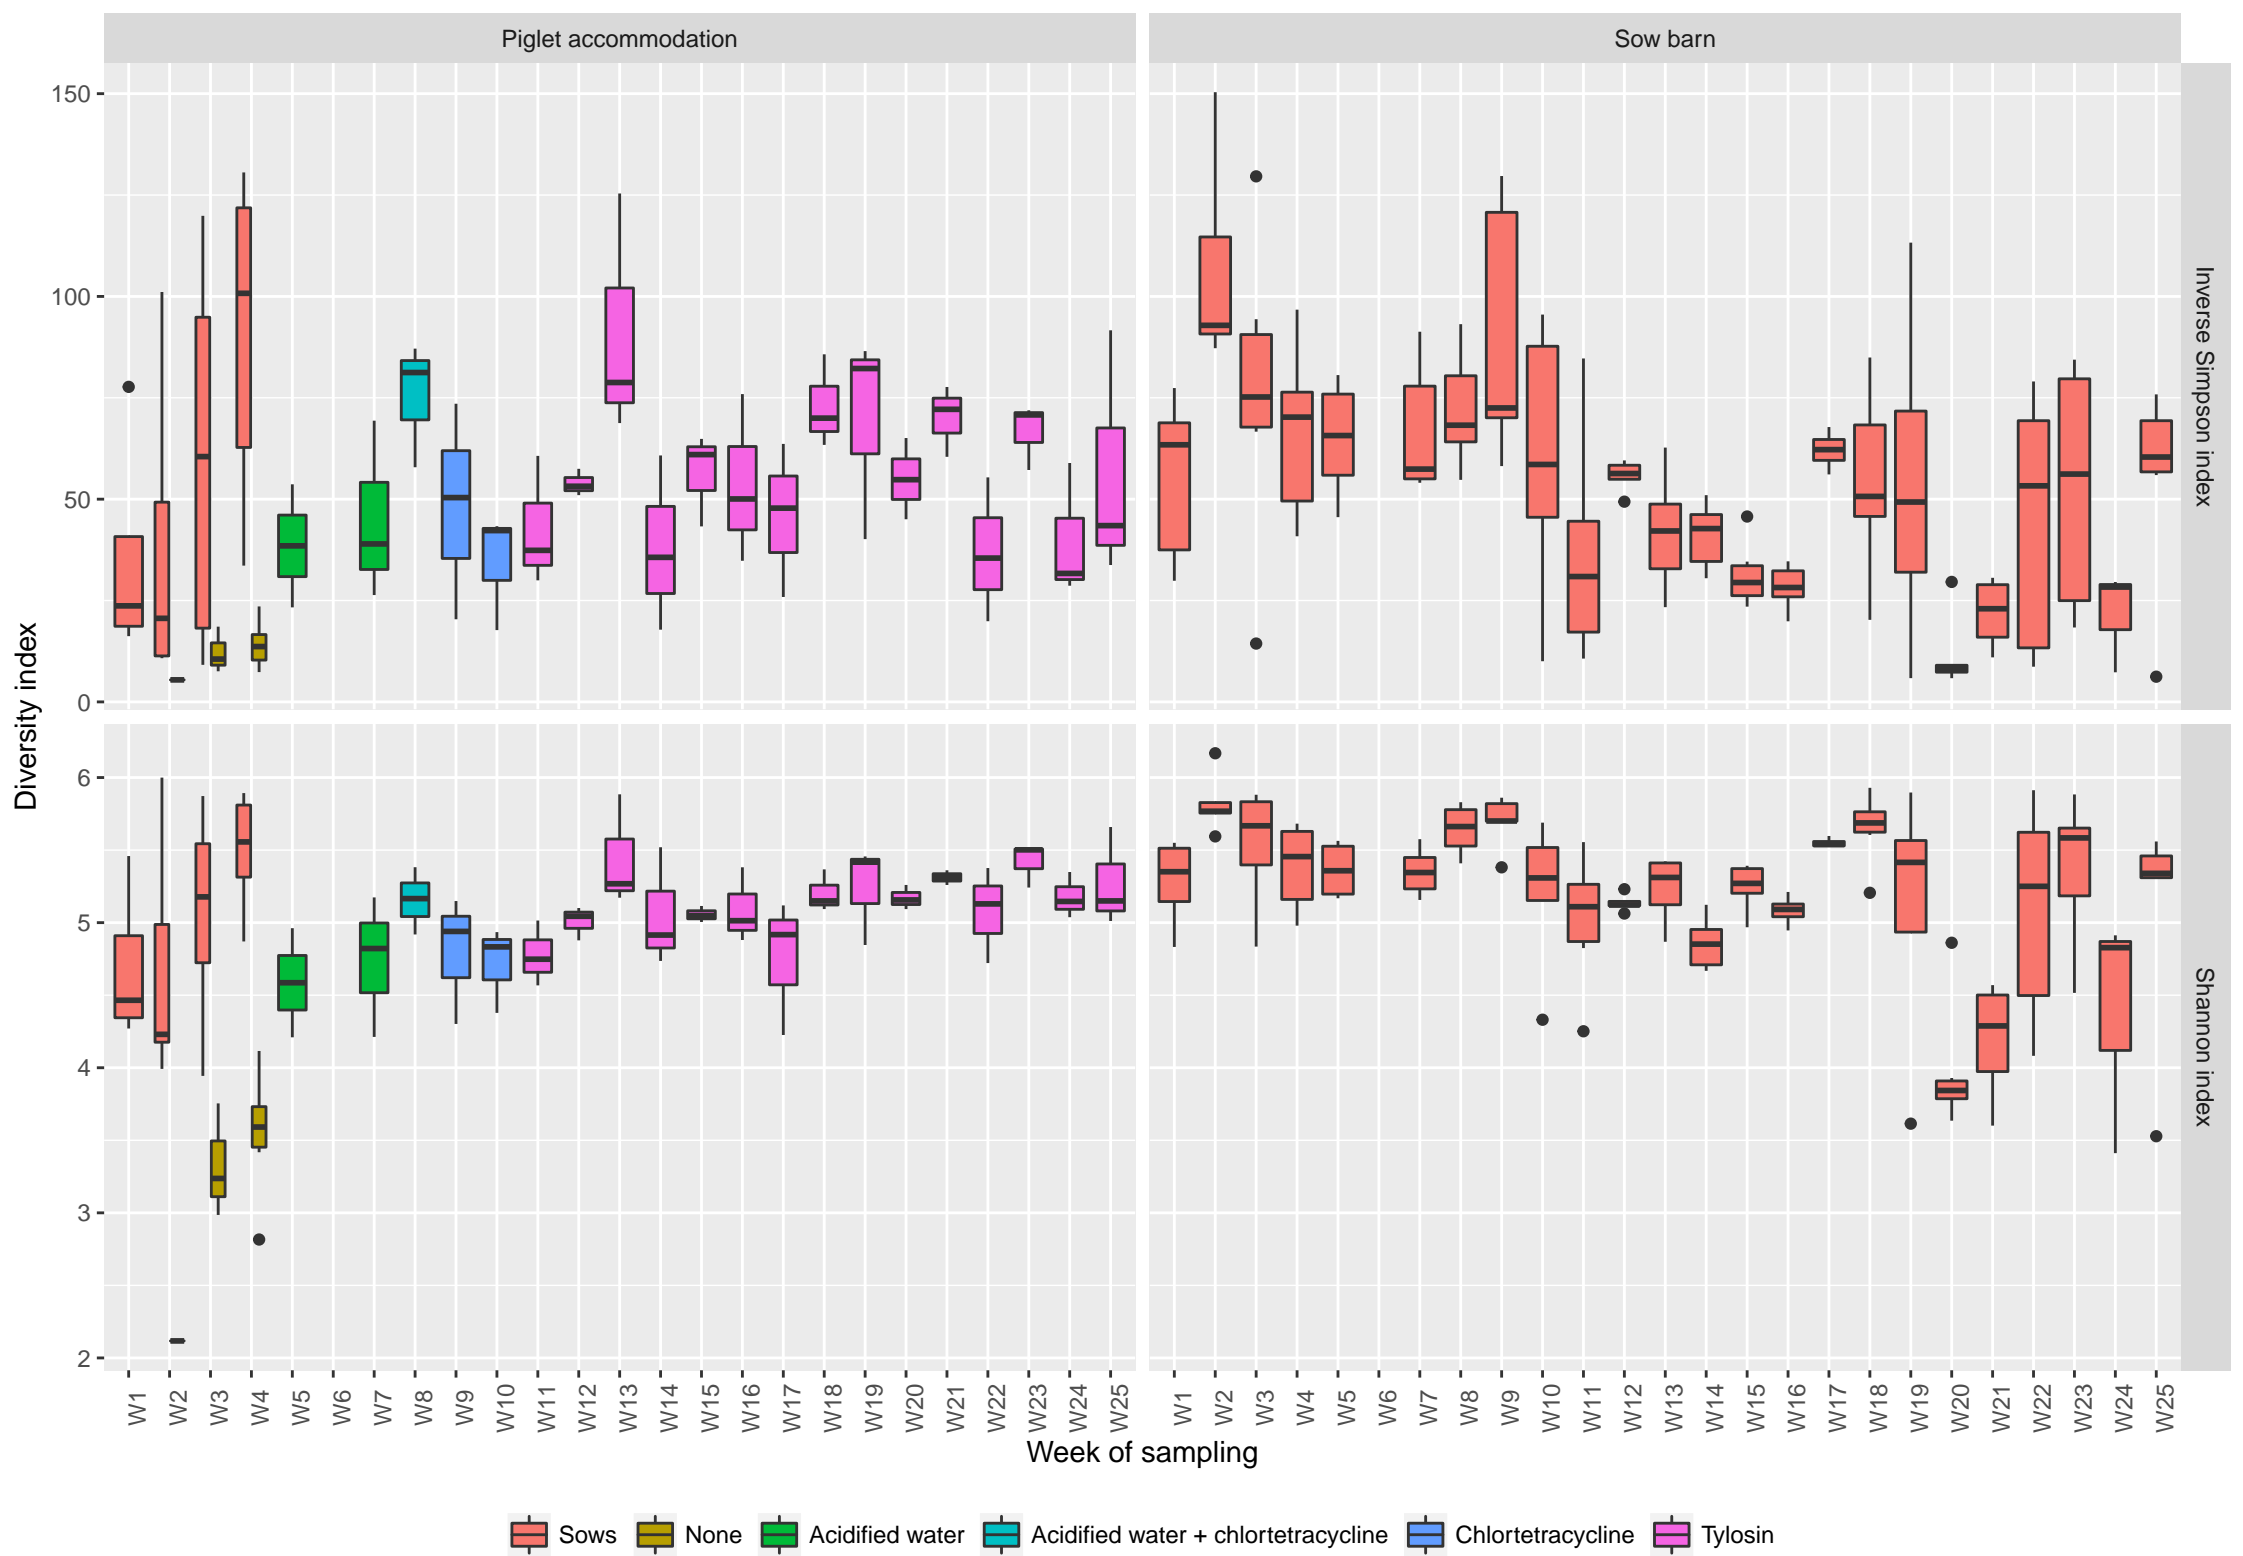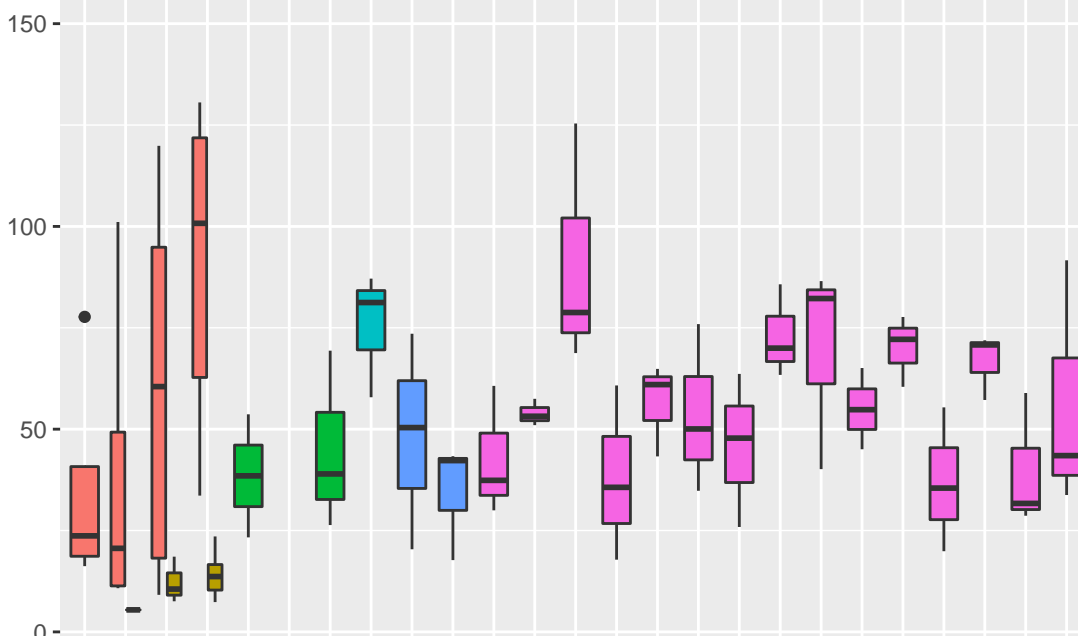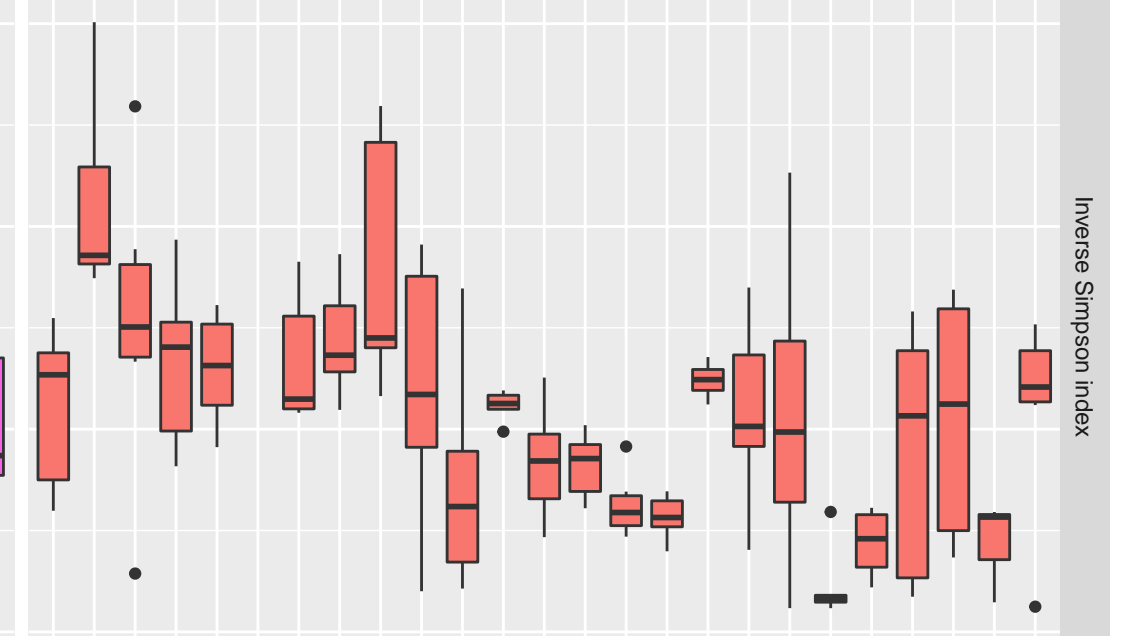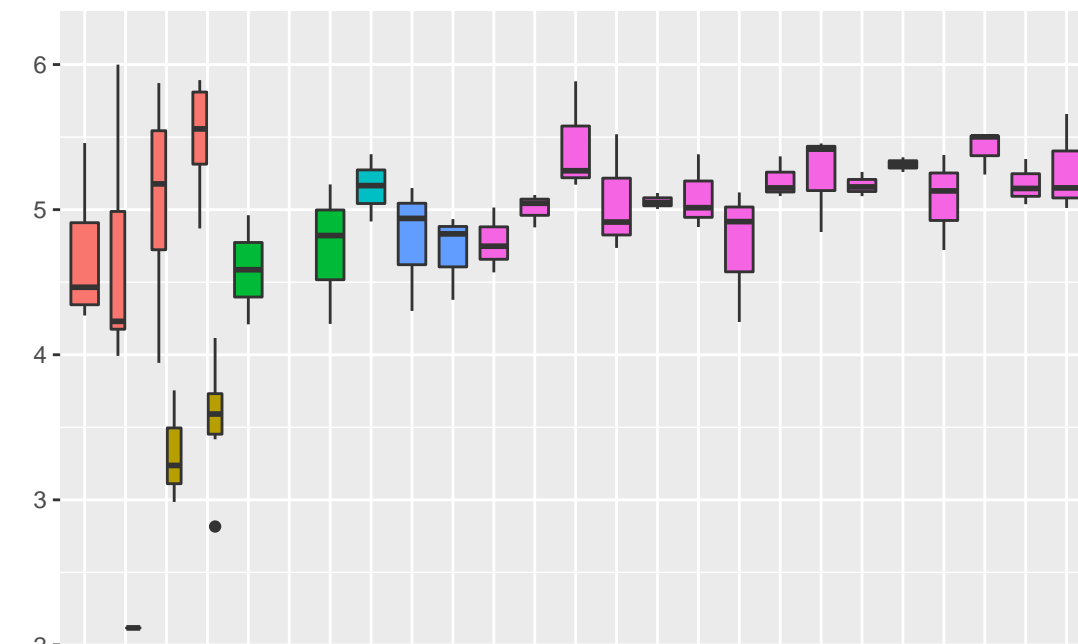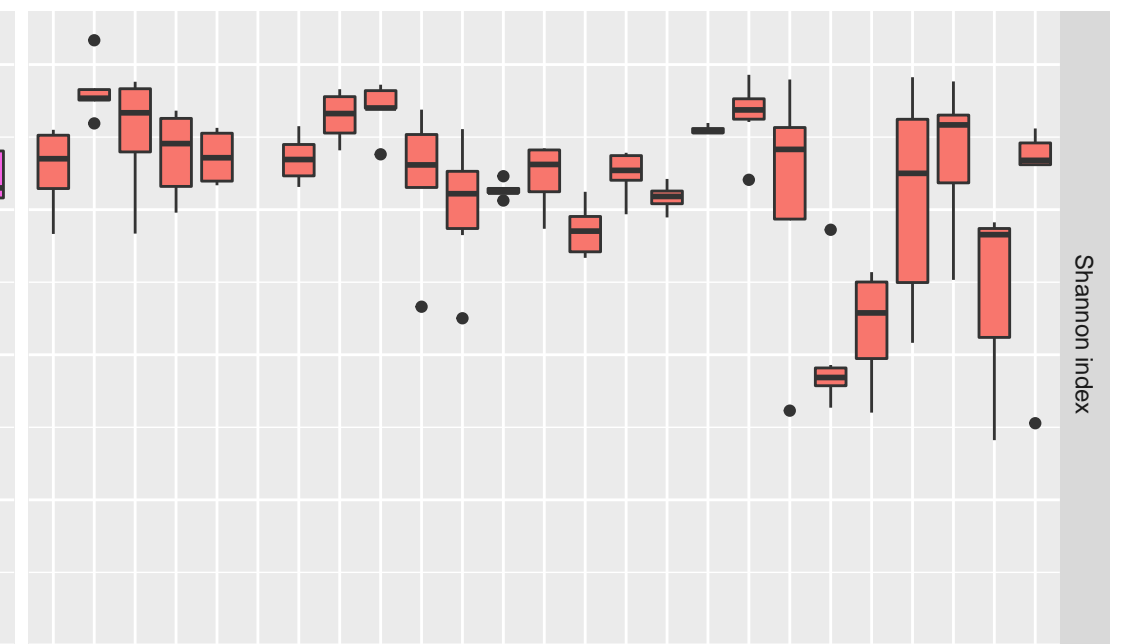

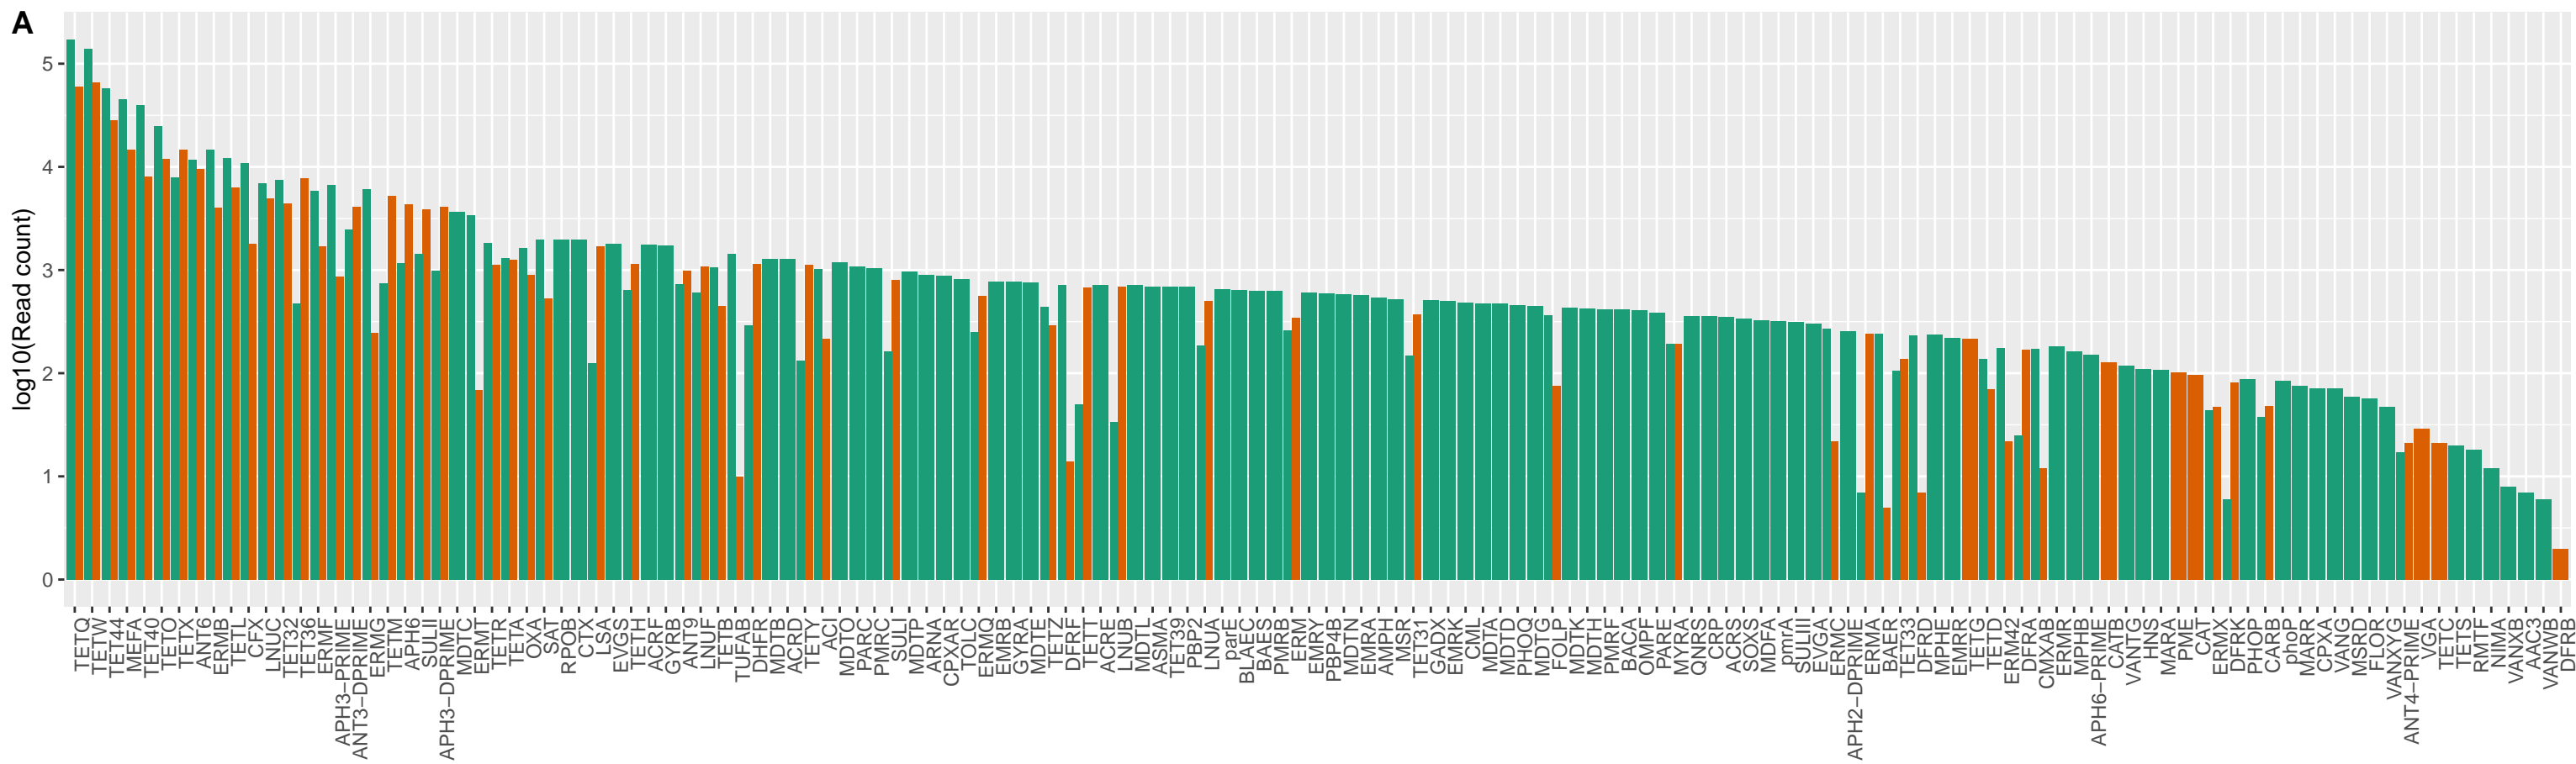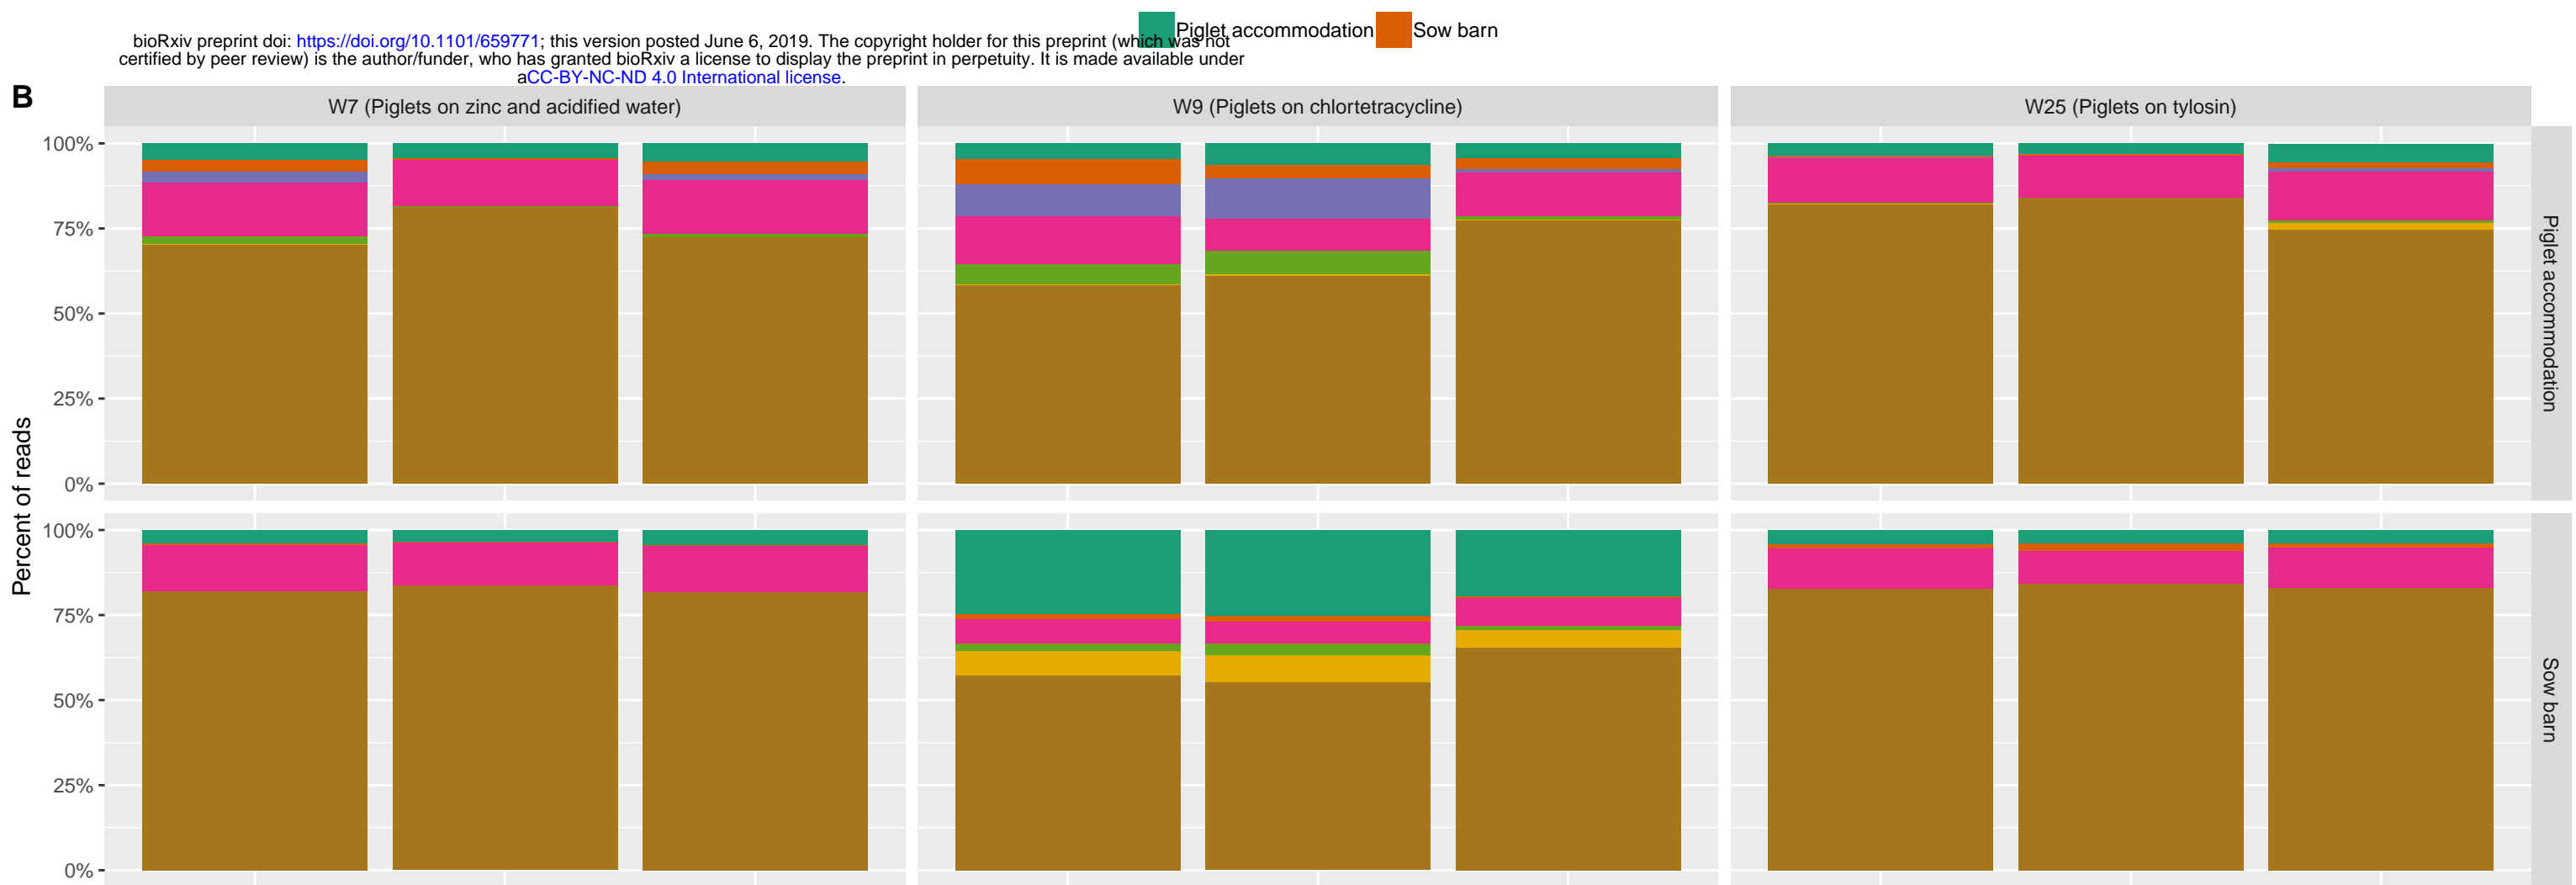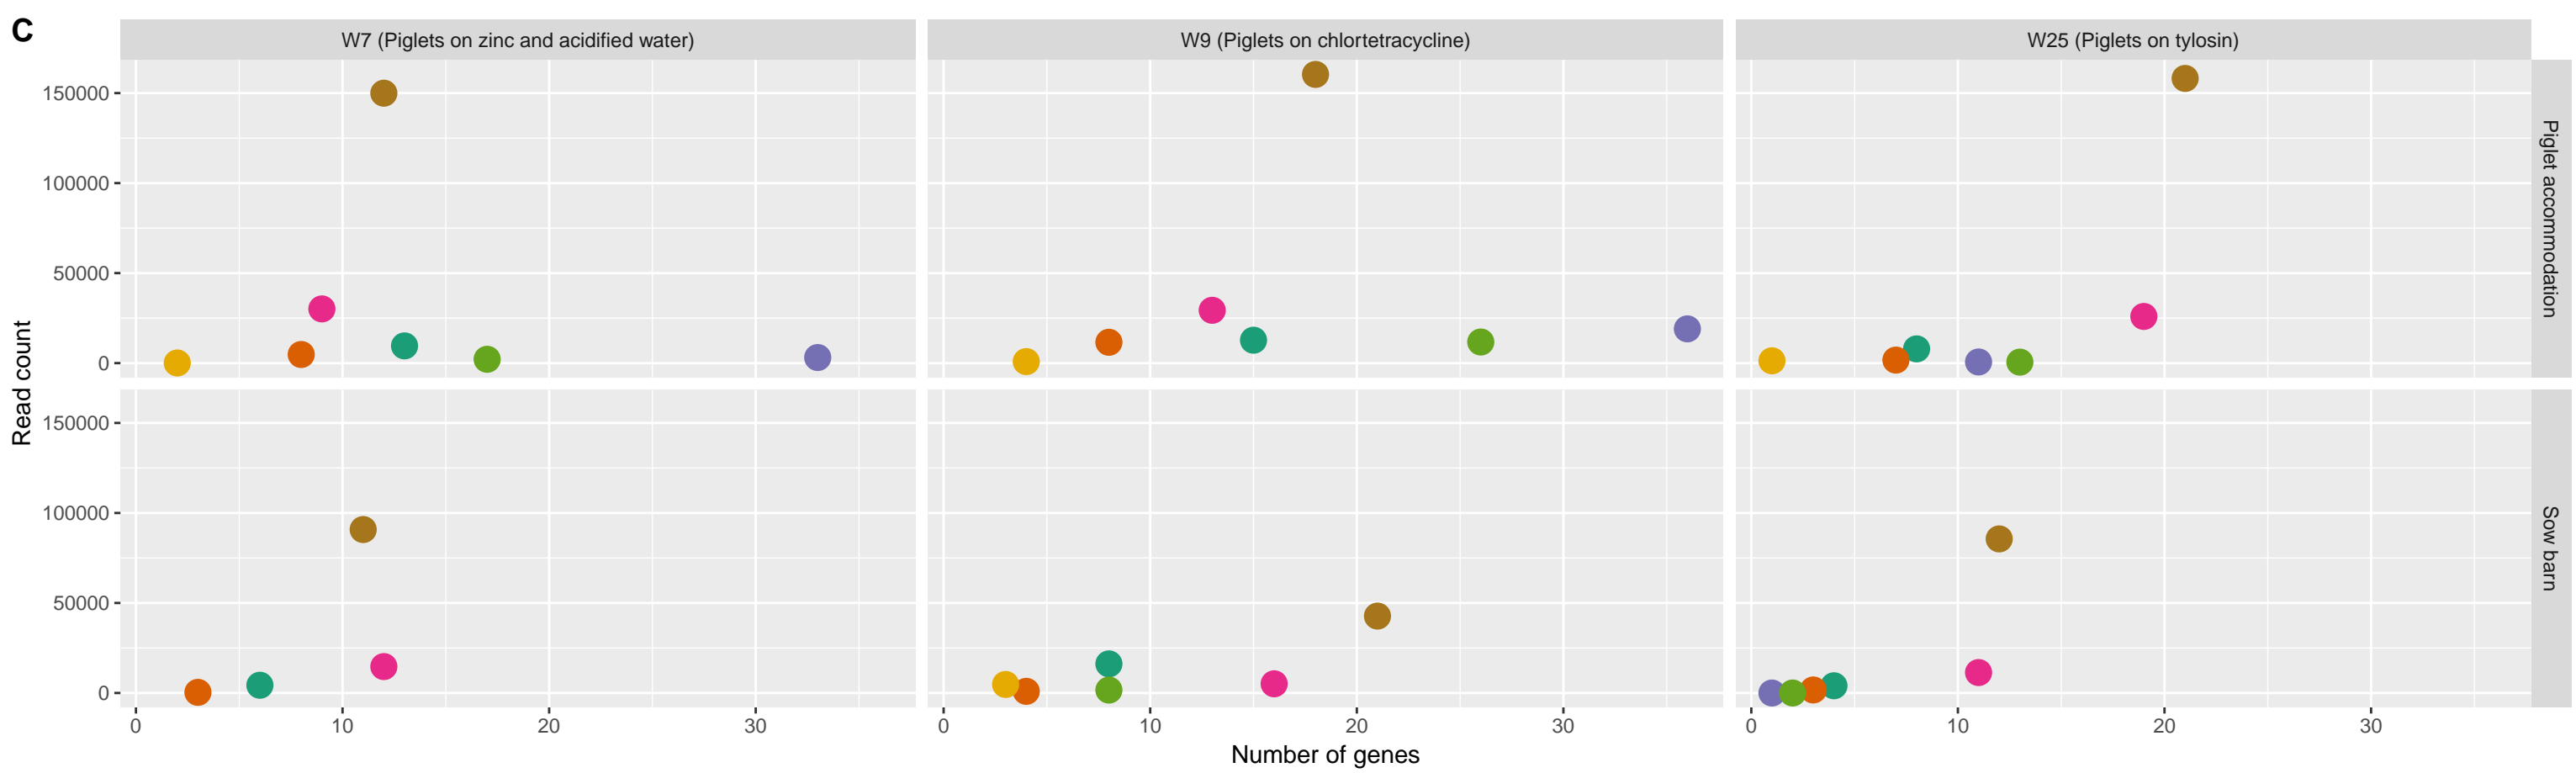

Source: http://biorxiv.org/content/10.1101/659771v1.full.pdf
